1 **Riverscape community genomics: A comparative analytical**  
2 **framework to identify common drivers of spatial structure**

3 Running title: Riverscape Community Genomics

4

5 Zachery D. Zbinden<sup>1\*</sup>, Marlis R. Douglas<sup>1</sup>, Tyler K. Chafin<sup>1,2</sup>, Michael E. Douglas<sup>1</sup>

6

7 <sup>1</sup>Department of Biological Sciences, University of Arkansas, Fayetteville, AR, USA

8 <sup>2</sup>Department of Ecology and Evolutionary Biology, University of Colorado, Boulder, CO, USA

9 \*Corresponding Author: [zdzbinde@uark.edu](mailto:zdzbinde@uark.edu)

10 **ABSTRACT**

11 Genetic diversity is a key component of population persistence. However, most genetic investigations of  
12 natural populations focus on a single species, overlooking opportunities for multispecies conservation  
13 plans to benefit entire communities in an ecosystem. We developed a framework to evaluate genomic  
14 diversity within and among many species and demonstrate how this *riverscape community genomics*  
15 approach can be applied to identify common drivers of genetic structure. Our study evaluated genomic  
16 diversity in 31 co-distributed native stream fishes sampled from 75 sites across the White River Basin  
17 (Ozark Mountains, USA) using SNP genotyping (ddRAD). Despite variance in genetic divergence,  
18 general spatial patterns were identified corresponding to river network architecture. Most species ( $N=24$ )  
19 were partitioned into discrete sub-populations ( $K=2-7$ ). We used partial redundancy analysis to compare  
20 species-specific genomic diversity across four models of genetic structure: Isolation by distance (IBD),  
21 isolation by barrier (IBB), isolation by stream hierarchy (IBH), and isolation by environment (IBE). A  
22 significant proportion of intraspecific genetic variation was explained by IBH ( $x^2=62\%$ ), with the  
23 remaining models generally redundant. Our results indicated that gene flow is higher within rather than  
24 between hierarchical units (i.e., catchments, watersheds, basins), supporting the Stream Hierarchy Model  
25 and its generality. We discuss our conclusions regarding conservation and management and identify the  
26 8-digit Hydrologic Unit (HUC) as the most relevant spatial scale for managing genetic diversity across  
27 riverine networks.

28

29 **KEYWORDS:**

30 Comparative population genetics; Fish; Hydrologic units; Population structure; RADseq; Stream  
31 hierarchy model

## 32 **1 | INTRODUCTION**

33 Genetic diversity is a quantitative metric applied across spatial and temporal scales (Huber et al., 2010;  
34 Leonard et al., 2017) tied to the evolutionary trajectories of species (Shelley et al., 2021). It also serves as  
35 a barometer for population-level persistence in accurately reflecting demographic history, connectivity,  
36 and adaptive potential (Davis et al., 2018; DeWoody et al., 2021; Paz-Vinas et al., 2018). Surprisingly,  
37 and despite its many accolades, genetic diversity is often underutilized in conservation planning (Laikre,  
38 2010; Paz-Vinas et al., 2018), in part due to a suite of affiliated necessities (i.e., specialized equipment,  
39 technical expertise, and required externalities such as genomics centers), all of which expand its bottom  
40 line (Blanchet et al., 2020). Moreover, when assessment does occur, it is most often limited to populations  
41 within a single species or a small cadre of entities within a species-group, thus minimizing the potential  
42 for much-needed generalizations (Anthonysamy et al., 2018).

43         When the concept of genetic diversity is applied in a comparative sense across co-distributed  
44 species, it provides a solid framework from which community-wide management and policy can be  
45 defined. For example, multispecies assessments can reveal common dispersal barriers (Pilger et al., 2017;  
46 Roberts et al., 2013), congruent distributions of genetic diversity (Hotaling et al., 2019; Ruzich et al.,  
47 2019), relevant spatial scales for management (Blanchet et al., 2020), and associations among species  
48 characteristics and genetic diversity (Bohonak, 1999; Pearson et al., 2014). Despite its potential  
49 complexity, a comprehensive management strategy can emerge, one more appropriately aligned towards  
50 managing numerous species, with long-term conservation goals beneficial to an entire community  
51 (Blanchet et al., 2017). In addition, it also tacitly encourages support by stakeholders for an overarching  
52 management plan, one representing a consensus across multiple species and ecosystems (Douglas et al.,  
53 2020).

54         The spatial structure of genetic variation is primarily dictated by gene flow and genetic drift  
55 within a species (Holderegger et al., 2006), with the uniformity of its distribution (i.e., panmixia;  
56 Rosenberg et al., 2005) serving as an implicit null hypothesis. The *de facto* alternative is that genetic  
57 variation is spatially autocorrelated (i.e., isolation by distance, IBD; Wright, 1943). For most species, a

58 significant relationship between genetic dissimilarity and geographic distance is the expectation  
59 (Meirmans, 2012), yet the strength of this association will vary (Bohonak, 1999; Singhal et al., 2018). For  
60 example, genetic divergence may be promoted by environmental dissimilarities (i.e., isolation by  
61 environment, IBE; Wang & Bradburd, 2014) or by physical barriers to dispersal (i.e., isolation by barrier,  
62 IBB; Cushman et al., 2006; Ruiz-Gonzalez et al., 2015).

63 For aquatic biodiversity, patterns of genetic divergence will also be governed by the structure and  
64 architecture of the riverine network (in contemporary and historic representations). Organisms within  
65 such dendritic networks are demonstrably impacted by the physical structure of the habitat (Peterson et  
66 al., 2013; White et al., 2020), with genetic relatedness as a surrogate for the underlying structural  
67 hierarchy (Hughes et al., 2009). While this is most apparent within the contemporary structure of river  
68 networks, their historic structure, i.e., paleohydrology, also serves to bookmark genetic diversity  
69 (Mayden, 1988; Strange & Burr, 1997). Moreover, the hierarchical complexity of these networks will  
70 likewise dictate population processes, as reflected within genetic diversities and divergences (Chiu et al.,  
71 2020; Hopken et al., 2013; Thomaz et al., 2016). Thus, spatial genetic structuring within such biodiversity  
72 should reflect isolation by stream hierarchy (IBH; *sensu* Stream Hierarchy Model (SHM); Meffe &  
73 Vrijenhoek, 1988). The initial genesis for the SHM was narrowly defined within desert stream fishes of  
74 the American West (Meffe and Vrijenhoek, 1988). An assessment of its generality, as compared to  
75 alternative isolating regimes, was thus imperative (Brauer et al., 2018; Hopken et al., 2013).

76 The factors that cause genetic structure can be confounding on the one hand (Perez et al., 2018)  
77 but also correlated on the other (Meirmans, 2012; Wang & Bradburd, 2014). Different mechanisms can  
78 mask the occurrence of major drivers by promoting those more ancillary with regard to single-species  
79 assessments. The emerging results are twofold: Potentially erroneous conclusions, which in turn beget  
80 ineffective management strategies. These issues can be effectively mitigated using replicated multispecies  
81 assessments to allow influential major processes to surface, thus effectively categorizing both 'signal and  
82 noise' components with the former driving patterns of regional biodiversity (Roberts et al., 2013).

83 Hypotheses relating to genetic structure are best contrasted by partitioning available genetic  
84 variation via partial redundancy analysis (Borcard et al., 1992; Chan & Brown, 2020), thus allowing the  
85 contrast of multiple alternative models. In turn, the best-performing model should be substantially  
86 correlated with other (more redundant) models but also provide the best explanation for residual variation  
87 once competing models adequately explain antecedent variability (Cushman et al., 2006). If alternative  
88 models explain significant amounts of genetic variation, then the null hypothesis of panmixia would be  
89 rejected. The main drivers of genetic diversity should then emerge as comparisons are made across the  
90 community's many species. This approach also allows the appropriate scale to be defined at which genetic  
91 and conservation perspectives can be integrated to optimize benefits across species.

92 Our objective was to establish a framework from which the generality of the SHM could be tested  
93 across constituents of a riverscape fish community. This framework would allow key drivers to be  
94 identified, with a concurrent expectation of common processes re-emerging within these ecological  
95 networks as the analysis was processed. We accomplish this by comparing patterns of genetic diversity  
96 across 31 fish species within the White River Basin of the Ozark Mountains (AR/MO, USA). For each,  
97 we contrasted four alternative models (Cushman et al., 2013) representing major drivers of genetic  
98 structure: Isolation by distance (IBD), isolation by stream hierarchy (IBH), isolation by barrier (IBB), and  
99 isolation by environment (IBE). Our data represent thousands of SNPs (single nucleotide  
100 polymorphisms), as derived via recent advances in high-throughput sequencing (Peterson et al., 2012).  
101 This has, in turn, allowed thousands of individuals to be genotyped as a financially and logistically  
102 practical research endeavor across multiple non-model species (da Fonseca et al., 2016). We offer our  
103 approach as a potential blueprint for developing more comprehensive genetic management plans at the  
104 community level.

105

106

107

108

## 109 **2 | MATERIALS AND METHODS**

### 110 **2.1 | Study system**

111 Our study system, the White River Basin, is located within the Western Interior Highlands of North  
112 America, a previous component of the more extensive pre-Pleistocene Central Highlands extending north  
113 and east but subsequently subsumed by numerous glacial advances into two disjunct sub-components:  
114 Western Interior Highlands (i.e., Ozark Plateau, Ouachita Mountains), and Eastern Highlands (i.e.,  
115 Appalachian Plateau, Blue Ridge, Appalachian Highlands) (Mayden, 1985). The Ozark Plateau remained  
116 an unglaciated refugium with elevated endemism and diversity (Warren et al., 2000). The White River  
117 Basin was established by at least Late Pliocene (>3 MYA; Jorgensen, 1993), but its eastern tributaries  
118 were captured by the Mississippi River when it bisected the basin during the Pleistocene (Mayden, 1988;  
119 Strange & Burr, 1997). This paleohydrologic signature may remain in contemporary patterns of  
120 population divergence in the White River Basin, as manifested by replicated patterns of genetic structure  
121 between eastern and western populations.

122

### 123 **2.2 | Sampling**

124 The sampling region for our study is composed of the White River and St. Francis River basins (AR/MO)  
125 (Figure 1). Both are tributaries to the Mississippi River, draining 71,911 km<sup>2</sup> and 19,600 km<sup>2</sup>,  
126 respectively. Five sub-basins are apparent: St. Francis, Upper White, Black, Lower White, and Little Red  
127 rivers (Figure 1). These are further subdivided into the following hierarchical Hydrologic Units (HUC)  
128 (USGS & USDA-NRCS, 2013; USGS, 2021) representing different spatial scales: HUC-4 Subregions  
129 ( $N=2$ ); HUC-6 Basins ( $N=3$ ); HUC-8 Subbasins ( $N=19$ ); HUC-10 Watersheds ( $N=129$ ) (Figure 1).

130         Sampling was approved by the University of Arkansas Institutional Animal Care and Use  
131 Committee (IACUC: #17077), with collecting permits as follows: Arkansas Game & Fish Commission  
132 (#020120191); Missouri Department of Wildlife Conservation (#18136); US National Parks Service  
133 (Buffalo River Permit; BUFF-2017-SCI-0013). Fishes were sampled using seine nets in wadable streams  
134 during low flow between June 2017 and September 2018. Time spent sampling a site ranged from 30–60

135 mins, with a target of 5-10 individuals/species encountered. Individuals were euthanized by immersion in  
136 tricaine methanesulfonate (MS-222) at a concentration of 500 mg/L, buffered to pH=7 with subsequent  
137 preservation in 95% ethanol. Formal species diagnosis occurred in the laboratory, and the right pectoral  
138 fin was removed from each specimen and stored in 95% ethanol at -20 °C prior to subsequent DNA  
139 extraction. Specimens are housed at the Arkansas Conservation and Molecular Ecology Lab, University  
140 of Arkansas, Fayetteville.

141

## 142 **2.2 | Genomic data collection and filtering**

143 Genomic DNA was isolated (Qiagen Fast kits; Qiagen Inc.) and quantified by fluorometry (Qubit;  
144 Thermo-Fisher Scientific). Individuals were genotyped using double-digest restriction site-associated  
145 DNA (ddRAD) sequencing (Peterson et al., 2012), with procedures modified appropriately (Chafin et al.,  
146 2019). Standardized DNA amounts (1,000 ng) were digested at 37°C with high-fidelity restriction  
147 enzymes *MspI* (5'-CCGG-3') and *PstI* (5'-CTGCAG-3') (New England Biosciences), bead-purified  
148 (Ampure XP; Beckman-Coulter Inc.), standardized to 100 ng, and then ligated with custom adapters  
149 containing in-line identifying barcodes (T4 Ligase; New England Biosciences). Samples were pooled in  
150 sets of 48 and size-selected from 326-426 bp, including adapter length (Pippin Prep; Sage Sciences).  
151 Illumina adapters and i7 index were added via 12-cycle PCR with Phusion high-fidelity DNA polymerase  
152 (New England Biosciences). Three libraries (3x48=144 individuals/lane) were pooled per lane and single-  
153 end sequenced on the Illumina HiSeq 4000 platform (1x100bp; Genomics & Cell Characterization Core  
154 Facility; University of Oregon, Eugene). Quality control checks, including fragment analysis and  
155 quantitative real-time PCR, were performed at the core facility before sequencing.

156 Raw Illumina reads were demultiplexed, clustered, filtered, and aligned in IPYRAD v.0.9.62  
157 (Eaton & Overcast, 2020). Reads were first demultiplexed, allowing up to one barcode mismatch,  
158 yielding individual FASTQ files containing raw reads ( $N=3,060$  individual files). Individuals averaged  $>2$   
159 million reads, with those extremely low removed ( $< x - 2s$ ) to reduce errors from poor quality  
160 sequencing. Individuals were screened for putative hybrids (Zbinden, Douglas, et al., 2022), and those

161 with admixed ancestry were removed. Raw sequence reads were partitioned by species ( $N=31$ ) and  
162 aligned *de novo* in IPYRAD (Eaton & Overcast, 2020). Adapters/primers were removed, and reads with  $>5$   
163 bases having Phred quality  $<20$  or read length  $<35$  bases (after trimming) were discarded. Clusters of  
164 homologous loci were assembled using an 85% identity threshold. Putative homologs were removed if  
165 any of the following were met:  $<20x$  and  $>500x$  coverage per individual;  $>5\%$  of consensus nucleotides  
166 ambiguous;  $>20\%$  of nucleotides polymorphic;  $>8$  indels present; or presence in  $<15\%$  of individuals.  
167 Paralogs were identified (and subsequently removed) as those clusters exhibiting either  $>2$  alleles per site  
168 in consensus sequence or excessive heterozygosity ( $>5\%$  of consensus bases or  $>50\%$  heterozygosity/site  
169 among individuals).

170 Biallelic SNP panels for each species were then visualized and filtered with the R package  
171 RADIATOR (Gosselin, 2020). To ensure high data quality, loci were removed if: Monomorphic; minor  
172 allele frequency  $<3\%$ ; Mean coverage  $<20$  or  $>200$ ; Missing data  $>30\%$ ; SNP position on read  $>91$ ; and if  
173 HWE lacking in one or more sampling sites ( $\alpha = 0.0001$ ). To reduce linkage disequilibrium, only one  
174 SNP per locus was retained (that which maximized minor allele count). Finally, singleton  
175 individuals/species at a sampling site and those with  $>75\%$  missing data in the filtered panel were  
176 removed.

177

### 178 **2.3 | Genetic structure**

179 Genetic structure was assessed using the resultant SNP genotypes. For each species ( $N=31$ ), pairwise  $F_{ST}$   
180 (Weir & Cockerham, 1984) was calculated among sites (HIERFSTAT; Goudet et al., 2017). Jost's  $D$  was  
181 also quantified among sites and globally, as it is based on the effective number of alleles rather than  
182 heterozygosity and hence less biased by sampling differences (Jost, 2008). Additional global intraspecific  
183  $F_{ST}$  analogs were also quantified for comparison: Multi-allelic  $G_{ST}$  (Nei, 1973) and unbiased  $G''_{ST}$   
184 (Meirmans & Hedrick, 2011) (MMOD; Winter, 2012). We tested for isolation by distance (IBD) using both  
185 linearized  $F_{ST}$  and Jost's  $D$ . Their relationships with river distance (log-transformed) were assessed using



186 the Mantel test (Mantel & Valand, 1970) (ECODIST; Goslee & Urban, 2020), then visualized using linear  
187 regression (Rousset, 1997).

188 Admixture analysis of population structure and ancestry coefficients were estimated using sparse  
189 non-negative matrix factorization (sNMF) (Frichot et al., 2014). We ran sNMF for each species, with 20  
190 repetitions per  $K$  value (1 to  $N$  sites or 20, whichever was smallest) and  $\alpha=100$  (LEA; Frichot & François,  
191 2015). The best  $K$  (i.e., number of distinct gene pools) from each sNMF run minimizes the cross-  
192 validation entropy criterion (Alexander & Lange, 2011). The best  $K$  was then used to impute missing data  
193 (*impute* function using method='mode' in LEA). The sNMF algorithm was then repeated (as above) using  
194 imputed genotypes. The resulting Q-matrices of ancestry coefficients were used to map population  
195 structure and served as the "IBB" (isolation by barrier) model below.

196 We further assessed among-site genetic variation between Hydrologic Units (HUCs) and discrete  
197 population clusters (determined via sNMF) using analysis of molecular variance (AMOVA) (Excoffier et  
198 al., 1992). AMOVA was performed for each species at four HUC levels (4-, 6-, 8-, and 10-digit) to  
199 compare the amount of genetic variation among HUCs, among all sites, and among sites within HUCs.  
200 The Watershed Boundary Dataset (USGS, 2021) assigned HUC classifications to each site. AMOVA was  
201 then performed for each species with genetic clusters  $K>1$  to compare the amount of genetic variation  
202 among populations, among all sites, and among sites within populations. The variance components were  
203 used to estimate  $\Phi$ -statistics (analogous to  $F$ -statistics):  $\Phi_{CT}$  = the genetic variation among groups (either  
204 HUCs or discrete populations);  $\Phi_{ST}$  = the genetic variation among sites across all groups; and  $\Phi_{SC}$  = the  
205 genetic variation among sites within groups. The wrapper R package POPPR (Kamvar et al., 2015) was  
206 used to implement the PEGAS (Paradis, 2010) version of AMOVA with default settings.

207

## 208 **2.4 | Modelling genetic structure**

209 We employed a variation partitioning framework (Capblancq & Forester, 2021; Chan & Brown, 2020) to  
210 compare four models of genetic structure for each species based on: IBD, IBB, IBH, and IBE. Individual  
211 genetic variation within each species was reduced to major axes of variation using principal components

212 analysis (PCA) on each SNP panel. The appropriate number of PCs retained for each species was based  
213 on observed eigenvalues, Rnd-Lambda (Peres-Neto et al., 2005), implemented in the R package  
214 PCDIMENSION (Coombes & Wang, 2019). Individual scores on the retained PCs represented individual  
215 genetic variation.

216 The first model (IBD) relied on river network distance measured between individuals (RIVERDIST;  
217 Tyers, 2017). The resulting distance matrix was then decomposed into positively correlated spatial  
218 eigenvectors using distance-based Moran's eigenvector maps (Chan & Brown, 2020) within the R  
219 package ADESPATIAL (Dray et al., 2020).

220 The second model (IBB) was based on individual population coefficients, i.e., population  
221 structure, from the Q-matrix generated above using sNMF. The assumption was that population structure  
222 indicates a reduction of gene flow between discrete populations due to a barrier (or high resistance) to  
223 dispersal. Note: This model could not be incorporated for species in which population structure was not  
224 apparent ( $K=1$ ), and these species were thus tested using only three models.

225 The third model (IBH) was constructed using four levels of HUCs (4-, 6-, 8-, and 10-digit) that  
226 characterized an individual's position within the stream hierarchy, i.e., hydrologic unit (USGS, 2021). We  
227 transformed the data matrix of individuals by HUC so that each unique HUC was represented at each  
228 corresponding level as a binary 'dummy' variable.

229 The fourth model (IBE) relied on contrasting environmental variation across sites that harbored  
230 individuals. Environmental variables were taken from a compendium of 281 factors related to five major  
231 classes: hydrology/physiography, climate, land cover, geology/soil composition, and anthropogenic  
232 impact (HYDRORIVERSv.1.0; Linke et al., 2019). Variables for each site were extracted prior to being  
233 separated into the five major classes, with invariant factors and those exhibiting collinearity being  
234 removed in a stepwise manner (USDMM; Naimi, 2013) until each had a variation inflation factor (VIF) <10.  
235 Standardization occurred by subtracting means and dividing by standard deviations. Variables within each  
236 class were selected for subsequent analyses using forward selection (Blanchet et al., 2008).

237 In summary: Variables were first tested for a relationship with the response data (individual  
238 genetic variation) using redundancy analysis (RDA). If the relationship was significant ( $\alpha < 0.05$ ), a  
239 stepwise forward procedure was carried out such that variables were selected if the adjusted  $R^2$  of the  
240 model increased significantly ( $\alpha < 0.05$ ) and the adjusted  $R^2$  did not exceed that of the overall model. This  
241 procedure was employed using the *ordiR2step* function in the R package *VEGAN* (Oksanen et al., 2020).  
242 The selected variables from each of the five classes were combined into a single matrix, then reduced to a  
243 set of PCs using robust principal components analysis (ROBPCA; Hubert et al., 2005). The number of  
244 PCs retained for each category was determined following Hubert and coworkers (2005), as implemented  
245 in the R package *ROSPCA* (Hubert et al., 2016).

246 Individual genetic variation (a matrix of PCs for each species) was then partitioned among the  
247 four explanatory models of genetic structure (Partial redundancy analysis; Anderson & Legendre, 1999;  
248 Capblancq & Forester, 2021). This allowed an estimation of individual genetic variation explained by  
249 each model, all models combined, and then each "pure" model after partitioning out variability explained  
250 by the other three. This allows the correlation structure among competing models to be visualized as  
251 redundant relationships.

252

## 253 **3 | RESULTS**

### 254 **3.1 | Sampling and data recovery summarized**

255 Collections ( $N=75$ ; Figure 1) yielded  $N=72$  species and  $N=3,605$  individuals. On average, we collected  
256  $\sim 11$  species/site, typical for streams sampled with seine nets in North America (Matthews, 1998) and  
257 similar highland streams within the Mississippi Basin (Zbinden, Geheber, Lehrter, & Matthews, 2022;  
258 Zbinden, Geheber, Matthews, Marsh-Matthews, 2022).

259 We genotyped  $N=3,060$  individuals across  $N=31$  species, with at least two individuals collected  
260 at  $\geq 5$  sampled sites. Simulations and empirical evaluations underscore the accuracy of  $F_{ST}$  estimates when  
261 large numbers of SNPs ( $\geq 1,500$ ) are employed across a minimum of two individuals (Nazareno et al.,  
262 2017; Willing et al., 2012). After removing samples with missing data  $>75\%$  and those as singletons of

263 their species at a site, the remaining  $N=2,861$  were analyzed for genetic structure (Table 1). The number  
264 of individuals analyzed per species ranged from 15–358 ( $x\bar{=}92.3$ ;  $s=80.8$ ), and the sites at which each  
265 species was collected ranged from 5–50 ( $x\bar{=}16.8$ ;  $s=11.2$ ). Number of individuals/species/site ranged  
266 from 2–15 ( $x\bar{=}5.1$ ;  $s=1.5$ ). Mean number of raw reads/individual/species spanned from 1.65 million to  
267 3.22 million ( $x\bar{=}2,289,230.0$ ;  $s=341,159.5$ ). Mean N of loci/species recovered by IPYRAD ranged from  
268 14,599–30,509 ( $x\bar{=}20,081.7$ ;  $s=4,697.6$ ) with a mean sequencing depth/locus of 73.6x ( $s=12.0x$ ). After  
269 filtering loci and retaining one SNP per locus, the panels for each species contained 2,168–10,033  
270 polymorphic sites ( $x\bar{=}4,486.7$ ;  $s=1,931.1$ ) with mean missing data/species at 12% ( $s=2\%$ ).

271

## 272 **3.2 | Genetic structure**

### 273 **3.2.1 | Among-site genetic divergence**

274 Distributions of among-site  $F_{ST}$  and  $D$  varied widely among species (Figure 2), as did global indices of  
275 genetic divergence (Table 2). All three global indices of fixation or genetic divergence ( $G_{ST}$ ,  $G''_{ST}$ ,  $D$ )  
276 were negatively correlated with within-site heterozygosity ( $H_S$ ), positively correlated with total  
277 heterozygosity ( $H_T$ ), and highly, positively correlated with each other (Table 3).

278 Regarding IBD, a significant relationship was found between linearized among-site  $F_{ST}$  and log-  
279 transformed among-site river network distance for 23 (74%) of the  $N=31$  species (Figure 3). Mantel  
280 coefficients ranged from 0.11–0.88 ( $x\bar{=}0.51$ ;  $s=0.19$ ). The slope of the linear relationship between  $F_{ST}$   
281 and distance for each species ranged from 0.003–2.62 ( $x\bar{=}0.46$ ;  $s=0.76$ ). Results were largely similar  
282 when IBD was tested with Jost's  $D$ , again with the same 23 species showing a significant relationship,  
283 along with two additional taxa: Smallmouth Bass (*Micropterus dolomieu*; Lacepède, 1802) and  
284 Largemouth Bass [*Micropterus salmoides*; (Lacepède, 1802)]. Mantel correlation coefficients ranged  
285 from 0.15–0.92 ( $x\bar{=}0.51$ ;  $s=0.19$ ). The slope of the linear relationship between Jost's  $D$  and log river  
286 network distance for each species ranged from 0.0007–0.28 ( $x\bar{=}0.04$ ;  $s=0.06$ ).

287

288

### 289 3.2.2 | Population structure

290 An apparent lack of discrete genetic structure emerged across seven species, suggesting continuous  
291 structuring at the spatial scale of our study (Figure 4). For the remaining 24 species, at least two and up to  
292 seven discrete sub-populations were identified (Figure 5). This structure corresponded at the broadest  
293 hierarchical level to the two major northern basins: Upper White and Black rivers, for all species sampled  
294 in both sub-basins ( $N=22$ ). There was also evidence of fine-scale structure for five species within the  
295 Little Red River Basin. Smaller catchments with distinct gene pools across multiple species included:  
296 North Fork (4 spp.), Buffalo (3 spp.), Upper Black (4 spp.), Current (3 spp.), and Spring rivers (4 spp.).  
297

### 298 3.2.3 | AMOVA

299 Discrete genetic structuring was also supported via AMOVA. Genetic variation among HUCs was  
300 significant for 24 species (Table 4). The genetic variance explained for these species by HUCs ranged  
301 from 1–70% ( $x^2=25.0\%$ ;  $s=20.7\%$ ). For the other seven species, variation among HUCs was  $\leq 1\%$ , save  
302 for Ozark Sculpin (*Cottus hypselurus*; Robins & Robison, 1985) and Creek Chub [*Semotilus*  
303 *atromaculatus*; (Mitchill, 1818)]. HUC differences for these accounted for >80% of the genetic variance  
304 but were non-significant due to a lack of power. Southern Redbelly Dace [*Chrosomus erythrogaster*;  
305 (Rafinesque, 1820)] could not be tested due to a lack of repeated samples within HUC levels. Further  
306 evidence of genetic structure among HUCs was revealed in the pattern of  $\Phi_{SC}$  (genetic divergence among  
307 sites within HUCs)  $< \Phi_{ST}$  (divergence among all sites) found across 26 species. The 8-digit HUC level  
308 explained the greatest genetic variance across 21 species (Table 4).

309 Genetic variation among discrete population clusters (based on sNMF) was significant for 21 of  
310 the  $N=31$  species (Table 4). Seven species were best described as single populations ( $K=1$ ) and were  
311 therefore not tested further. For those exhibiting structure, the genetic variance among clusters ranged  
312 from 5–95% ( $x^2=38.0\%$ ;  $s=26.5\%$ ). The three species without significant structure, despite  $K>1$  via  
313 sNMF, could likely be explained by low power resulting from a small number of sample sites. Again, as

314 with HUCs,  $\Phi_{SC} < \Phi_{ST}$  was observed. However, all tested species showed this pattern (i.e., sites within the  
315 same population were less differentiated than sites across all populations).

316

### 317 **3.3 | Models of genetic structure**

318 Variability in genetic diversity was partitioned across four models of genetic structure for the  $N=31$   
319 species. Principal components of SNP panel variation served as representatives of genetic variation.

320 Across species, the number of genetic PCs ranged from 2–93 ( $x\bar{=}20.0$ ;  $s=20.1$ ; Table 1). Cumulative  
321 genomic variance explained ranged from 24.7–88.7% ( $x\bar{=}46.2\%$ ;  $s=14.3\%$ ; Table 1).

322 Combining the four models (IBD, IBB, IBH, IBE) accounted for between 3–100% of the  
323 genomic diversity across species ( $x\bar{=}63.0\%$ ;  $s=35.3\%$ ; Figure 6). Isolation by stream hierarchy (IBH;  
324  $x\bar{=}62.0\%$ ;  $s=34.7\%$ ) and barrier (IBB;  $x\bar{=}49.3\%$ ;  $s=30.0\%$ ) contributed most to the total variation  
325 explained, while distance (IBD;  $x\bar{=}32.1\%$ ;  $s=25.1\%$ ) and environment (IBE;  $x\bar{=}33.0\%$ ;  $s=21.4\%$ )  
326 explained less (Figure 6). Variation explained by "pure" models, after accounting for that explained by  
327 the other three, was  $>0$  only for stream hierarchy and barrier (Figure 6), suggesting that distance and  
328 environment are encapsulated by the former. Indeed, correlative structure among models revealed most  
329 genetic variance was explained by stream hierarchy, with the other models largely redundant (Figure 7).

330

## 331 **4 | DISCUSSION**

332 Genetic diversity is an essential metric for inferring evolutionary processes and guiding conservation.

333 Single-species estimates of genetic diversity are standard given practical constraints, e.g., funding  
334 mandates for species of conservation concern. However, adopting a multispecies framework for analyzing  
335 genetic diversity could allow for more comprehensive management plans to be developed by focusing on  
336 commonalities (rather than differences) among species. The Stream Hierarchy Model (Meffe &  
337 Vrijenhoek, 1988) posits that the dispersal of stream-dwelling organisms is more limited between  
338 hierarchical units (basins, sub-basins, watersheds) than within. If this model was generalizable, it could  
339 determine relevant scales and regions for managing genetic diversity.

340 Our multispecies approach yielded two salient points: 1) From a macro-perspective, river network  
341 topology and complexity are manifested in common patterns of genetic structure across species; and 2) on  
342 a finer scale, the degree of intraspecific genetic divergence varies widely among co-distributed species.  
343 Most species showed significant IBD patterns but also discrete population sub-structure, as reflected most  
344 strongly by sub-basin delineations (e.g., HUC-8). These patterns were corroborated by AMOVA and  
345 variance partitioning and are generalized across species. Overall, stream fish genetic structure was  
346 indicative of dispersal limited primarily among *versus* within river catchments.

347

#### 348 **4.1 | Drivers of isolation at the basin-wide scale**

##### 349 4.1.1 *Isolation by Distance and river networks*

350 IBD is expected when a genetic study's spatial extent is greater than individuals' average dispersal  
351 distance, i.e., distance moved from natal habitat to breeding habitat. Indeed, significant IBD patterns were  
352 detected in 81% of the species in our study. However, the strength of the relationship was generally weak  
353 (Mantel  $r = 0.47$  &  $0.51$  for linearized  $F_{ST}$  and  $D$ , respectively).

354 While IBD may primarily explain genetic variation along a single stream or river, i.e., linear  
355 scale, it fails to incorporate the spatial structure of riverine networks (Thomaz et al., 2016). Therefore,  
356 IBD may not be an appropriate general model for fish genetic structure at the network scale (Hopken et  
357 al., 2013). IBD plots for many species (Figure 3) showed high genetic divergence even among relatively  
358 proximate localities, with apparent clusters indicating discrete rather than continuous structure (Guillot et  
359 al., 2009). This evidence suggests that — at the network scale — a more nuanced pattern occurs, with  
360 high residual variation resulting. The failure of IBD to account for large amounts of variation in genetic  
361 divergence reflects additional resistance to dispersal, as caused by longitudinal changes in habitat  
362 characteristics such as slope, depth, volume, and predator composition. For example, two river reaches of  
363 equal length can have very different habitat matrices, and these can be more influential on gene flow than  
364 space alone (Guillot et al., 2009; Lowe et al., 2006; Ruiz-Gonzalez et al., 2015).

365

366 4.1.2 *Stream Hierarchy Model*

367 Our results show that individual genetic variation is best explained by the Stream Hierarchy Model  
368 (Brauer et al., 2018; Hopken et al., 2013; Meffe & Vrijenhoek, 1988). In other words, the majority of  
369 variation explained by IBD, IBE, and IBB could be accounted for by IBH alone. This was corroborated  
370 via variation partitioning, in which IBD, IBE, and IBB models were redundant with IBH. A concordance  
371 of population structure with stream hierarchy yielded a similar percentage of among-site genetic variation,  
372 as explained by among-HUC and among-population groupings. In short, variance explained by distance  
373 and environment was due to differences among HUC drainages. These results highlight the necessity of  
374 accounting for population structure prior to exploring the relationship between genotypes and  
375 environmental heterogeneity, e.g., within genotype by environment frameworks (Lawson et al., 2020).  
376

377 4.1.3 *Disentangling cumulative effects*

378 Our analyses also revealed complex spatial patterns of genetic diversity. We evaluated competing  
379 isolation models using a framework that identified distance and barriers as putative drivers, with strong  
380 genetic divergence identified even across short geographical distances (Chan & Brown, 2020; Ruiz-  
381 Gonzalez et al., 2015). This interaction can confound analyses that incorporate either alone. For example,  
382 if sampling is clustered, discrete genetic groups can be spuriously inferred along an otherwise continuous  
383 gradient of genetic variation (Frantz et al., 2009). Furthermore, a continuous pattern can be erroneously  
384 extrapolated when the underlying reality is described by distinct clusters separated by geographic distance  
385 (Meirmans, 2012). Here we echo the importance of testing various hypotheses concerning genetic  
386 structure (Perez et al., 2018). Idiosyncrasies and complex interactions cannot be discerned by testing  
387 single models in isolation (e.g., discrete structure or IBD).

388

389 **4.2 | Drivers of variation within and among species**

390 The species assayed herein display marked differences concerning dispersal capability (Shelley et al.,  
391 2021). Given this, we expected genetic structure to widely vary among species across our study region



392 (Comte & Olden, 2018; Husemann et al., 2012; Pilger et al., 2017). Dispersal-related traits drive gene  
393 flow among localities and determine the spatial scale at which patterns of genetic structure emerge  
394 (Bohonak, 1999; Riginos et al., 2014). The physical structure of the river network then further modulates  
395 these patterns by dictating dispersal pathways of metapopulations and their colonization and extinction  
396 probabilities (Falke et al., 2012; Labonne et al., 2008; Fagan, 2002). These superimposed processes  
397 promote genetic divergence among distal populations (Thomaz et al., 2016; Chiu et al., 2020). Similar  
398 patterns emerge when analyzing community diversity via species composition. Headwater streams tend to  
399 have very different communities due to dispersal limitations (Finn et al., 2011; Zbinden & Matthews,  
400 2017; Zbinden, Geheber, Lehrter, & Matthews, 2022). Hence the interaction between traits and  
401 environment is an overarching influence that unites ecology and evolution.

402         Many species studied herein are small-bodied with aggregate distributions in upland and  
403 headwater streams (Robison & Buchanan, 2020). Thus, species-specific dispersal limitations, as imposed  
404 by unsuitable riverine habitats (Radinger & Wolter, 2015; Schmidt & Schaefer, 2018), explain  
405 considerable variation in genetic structuring within the White River. Large rivers are hypothesized as  
406 inhospitable habitats to upland fishes (e.g., resources, depth, turbidity, substrates) and impose resistance  
407 to successful migration (e.g., higher discharge, greater density of large-bodied predators). These  
408 characteristics constrain migration and limit gene flow amongst basins that drain into large rivers (Fluker  
409 et al., 2014; Schmidt & Schaefer, 2018; Turner & Robison, 2006). The results are asymmetric gene flow  
410 and source-sink metapopulation dynamics, with susceptible species, those smaller and less tolerant,  
411 diverging most rapidly (Campbell Grant et al., 2007).

412         Other life-history traits may also play a role as well. For example, those that directly influence  
413 effective population size (Nei & Tajima, 1981) may generate differences among species regarding the rate  
414 at which genetic differences arise (Blanchet et al., 2020). Species with 'slow' life histories, characterized  
415 by longer generations and delayed maturity, show an increased probability of local extirpation, inflating  
416 genetic drift concomitant with global extinction risk (Hutchings et al., 2012; Pearson et al., 2014; Chafin  
417 et al., 2019). Similar contingencies exist for other ecological traits, such as highly specialized trophic

418 adaptations, narrow environmental tolerances, or those that follow the same general mechanism by  
419 predisposing species to fragmented population structures (Olden et al., 2008). Ecological traits are  
420 mirrored by morphology (Douglas & Matthews, 1992), underscoring an interaction of trait effects that are  
421 difficult to disentangle. Ultimately, intraspecific genetic divergence is driven by a combination of factors  
422 that influence population size, demographic history, and connectivity. Clearly, these complex interactions  
423 among drivers require more comparative multispecies assessments as they shape genetic diversity and  
424 structure within and among species (microevolutionary scale) and thus ultimately lead to speciation and  
425 extinction (macroevolutionary scale). Our analytical framework outlined herein provides a template for  
426 such community-genomics studies.

427

### 428 **4.3 | Disentangling historic and contemporary drivers**

#### 429 4.3.1 *Paleohydrology in the White River system*

430 In this study, discrete population structure coincides with major topological divides within the White  
431 River stream network, such as a consistent east/west divide between Upper White and Black rivers,  
432 mirroring prior community composition studies (Matthews & Robison, 1988; 1998). Similar patterns  
433 were observed at smaller scales among drainages within the study region, as reported for White River  
434 crayfish (Fetzner & DiStefano, 2008). While the Lower White and Black rivers are certainly  
435 contemporary large-river habitats, both would have been much larger pre-Pleistocene when together they  
436 represented the main channel of the Old Mississippi River (Mayden, 1988; Strange & Burr, 1997). This  
437 large-river habitat would have separated the eastern and western highland tributaries, with inhospitable  
438 habitat for upland species. Pronounced limitations regarding historic dispersal induced by the Old  
439 Mississippi could explain the greater isolation of the Little Red River and Black River tributary  
440 populations compared to those in the Upper White River. Here, additional work should incorporate  
441 coalescent perspectives (e.g., Oaks, 2019) that test the role of past geomorphic events in driving co-  
442 divergence and co-demographic patterns, such as the Pleistocene incursion by the Old Mississippi into the  
443 modern Black River channel.

444

445 4.3.2 *Contemporary drivers*

446 Spatial discontinuities in genetic structure can also reveal contemporary barriers to migration/gene flow  
447 (Lee et al., 2018; Ruiz-Gonzalez et al., 2015). The Upper White River dams (e.g., Norfolk, Bull Shoals,  
448 Table Rock, and Beaver dams) represent the most apparent anthropogenic barriers to gene flow. Dams  
449 elsewhere have demonstrated discrete population structures above and below the structure (Roberts et al.,  
450 2013). However, impacts can be limited due to the relatively short period these dams have been in place  
451 (Ruzich et al., 2019). Those on the White River were constructed between 1912 (Taneycomo Powersite  
452 Dam) and 1966 (Beaver Dam).

453 Our study was not explicitly designed to assess impoundment effects on diversity, nor were they  
454 directly tested. Nevertheless, evidence of discrete population structure has emerged, corresponding to the  
455 location of such dams. Four species showed discrete populations within the North Fork River above the  
456 Norfolk Dam: Southern Redbelly Dace [*Chrosomus erythrogaster*; (Rafinesque, 1820)]; Yoke Darter  
457 (*Etheostoma juliae*; Meek, 1891); Northern Studfish [*Fundulus catenatus*; (Storer, 1846)]; and  
458 Blackspotted Topminnow [*Fundulus olivaceus*; (Storer, 1845)] (sites colored magenta; Figure 5). One  
459 species, Orangethroat Darter [*Etheostoma spectabile*; (Agassiz, 1854)], showed a distinct population in  
460 the James River above Table Rock Dam (sites colored gold; Figure 5). However, both North Fork and  
461 James rivers drain eight-digit HUC watersheds, which explains high amounts of genetic variation across  
462 the study region, regardless of dams. This highlights the importance of understanding 'natural' network-  
463 wide patterns of genetic structure prior to deriving conclusions regarding anthropogenic barriers,  
464 particularly when they coincide with stream hierarchy. Differentiating dams as barriers *versus* stream  
465 hierarchy could be accomplished through divergence time estimates (Hansen et al., 2014). That aspect, as  
466 it now stands, is beyond the scope of our study.

467

468

469

## 470 **5| CONCLUSIONS**

471 The multispecies comparative approach employed here revealed general patterns that could not have been  
472 discerned from a singular study of any one species. Additionally, the variability in intraspecific genetic  
473 structure among species provides a specific, all-encompassing dimension that single-species studies  
474 cannot. While meta-analytic frameworks have some potential, they are limited by confounding effects  
475 that stem from differences between studies, such as markers, sample sizes, environmental exigencies, and  
476 historic context. This necessitates a community-level approach within a study region. Further work aimed  
477 at modeling variables can lead to greater insight, ultimately improving our hypotheses regarding genetic  
478 diversity for which contemporary data are unavailable.

479       Importantly, our comparative framework supports the Stream Hierarchy Model as a general model  
480 for the genetic structure of lotic fish species and suggests that hydrologic units characterize regional  
481 genetic diversity quite well. Out of this result emerged the potential for HUC units to serve as a 'rule of  
482 thumb' for riverine biodiversity conservation. None of the species evaluated herein were panmictic.  
483 Genetic variation among HUCs was apparent despite limited evidence of discrete population or  
484 continuous structure. Across a suite of commonly occurring fishes representing seven families, we  
485 identified greater intraspecific gene flow within basins/sub-basins, rather than gene flow among them.  
486 Therefore, fish populations within separate HUCs at the 8-digit+ level (e.g., HUC6, HUC4, HUC2)  
487 should be considered isolated until proven otherwise (Shelley et al., 2021).

488       As previously recognized, independent populations warrant independent management (Hopken et  
489 al., 2013). When migration is low or non-existent, management of one population is unlikely to impact  
490 another. Genetic variation unique to hydrologic units could allow for adaptation to future environmental  
491 change, while on the other hand, isolation of populations could underscore elevated extirpation risks  
492 (Harrisson et al., 2014). Furthermore, efforts to propagate populations via stocking or translocation should  
493 carefully assess the genetic landscape of the species in question, particularly before co-mingling diversity  
494 from different sub-basins (Meffe & Vrijenhoek, 1988). Such uninformed mixing of genetic stocks could

495 promote outbreeding and the erosion of unique genetic diversity within river catchments. However, this  
496 must be weighed against the risks of local extirpation (Pavlova et al., 2017).

497         Given this study's general and comparative nature, we refrain from designating populations within  
498 species as potential management units (MUs). However, species showing high levels of genetic structure  
499 (Table 2) should be assessed individually for such designation, possibly requiring more fine-scaled,  
500 targeted sampling. Additional river/sub-basin-specific management efforts could also be justified, given  
501 the presence of unique populations across multiple species (Hopken et al., 2013). Here we specifically  
502 refer to: The Little Red, North Fork, Buffalo, Upper Black, Current, and Spring rivers. These may indeed  
503 represent evolutionarily significant catchments, and this insight underscores the potential for community-  
504 level genetic examination to elevate management to the ecosystem scale.

505

## 506 **ACKNOWLEDGEMENTS**

507 We thank M. Flurry, M. George, T. Goodhart, K. Hollar, and M. Reed, who assisted with DNA  
508 extractions. The Arkansas High-Performance Computing Center provided analytical resources. Funding  
509 was provided by the University of Arkansas Distinguished Doctoral Fellowship and Harry and Jo Leggett  
510 Chancellor's Fellowship (ZDZ), the Bruker Professorship in Life Sciences (MRD), the Twenty-First  
511 Century Chair in Global Change Biology (MED), and by an NSF Postdoctoral Research Fellowship in  
512 Biology (TKC) [DBI: 2010774]. The findings, conclusions, and opinions expressed in this article  
513 represent those of the authors and do not necessarily represent the views of the NSF nor other affiliated or  
514 contributing organizations.

515 **REFERENCES**

- 516 Alexander, D. H., & Lange, K. (2011). Enhancements to the ADMIXTURE algorithm for individual  
517 ancestry estimation. *BMC Bioinformatics*, *12*(1), 1–6. <https://doi.org/10.1186/1471-2105-12-246>
- 518 Anderson, M. J., & Legendre, P. (1999). An empirical comparison of permutation methods for tests of  
519 partial regression coefficients in a linear model. *Journal of Statistical Computation and Simulation*,  
520 *62*(3), 271–303. <https://doi.org/10.1080/00949659908811936>
- 521 Anthonysamy, W. J. B., Dreslik, M. J., Douglas, M. R., Thompson, D., Klut, G. M., Kuhns, A. R.,  
522 Mauger, D., Kirk, D., Glowacki, G. A., Douglas, M. E., & Phillips, C. A. (2018). Population genetic  
523 evaluations within a co-distributed taxonomic group: a multispecies approach to conservation  
524 planning. *Animal Conservation*, *21*(2), 137–147. <https://doi.org/10.1111/acv.12365>
- 525 Blanchet, F. G., Legendre, P., & Borcard, D. (2008). Forward selection of explanatory variables. *Ecology*,  
526 *89*(9), 2623–2632. <https://doi.org/10.1890/07-0986.1>
- 527 Blanchet, S., Prunier, J. G., & De Kort, H. (2017). Time to Go Bigger: Emerging Patterns in  
528 Macrogenetics. *Trends in Genetics*, *33*(9), 579–580. <https://doi.org/10.1016/j.tig.2017.06.007>
- 529 Blanchet, S., Prunier, J. G., Paz-Vinas, I., Saint-Pé, K., Rey, O., Raffard, A., Mathieu-Bégné, E., Loot, G.,  
530 Fourtune, L., & Dubut, V. (2020). A river runs through it: The causes, consequences, and  
531 management of intraspecific diversity in river networks. *Evolutionary Applications*, *13*(6), 1195–  
532 1213. <https://doi.org/10.1111/eva.12941>
- 533 Bohonak, A. J. (1999). Dispersal, Gene Flow, and Population Structure. *The Quarterly Review of Biology*,  
534 *74*(1), 21–45. <https://doi.org/10.1086/392950>
- 535 Borcard, D., Legendre, P., & Drapeau, P. (1992). Partialling out the spatial component of ecological  
536 variation. *Ecology*, *73*(3), 1045–1055. <https://doi.org/10.2307/1940179>
- 537 Brauer, C. J., Unmack, P. J., Smith, S., Bernatchez, L., & Beheregaray, L. B. (2018). On the roles of  
538 landscape heterogeneity and environmental variation in determining population genomic structure in  
539 a dendritic system. *Molecular Ecology*, *27*(17), 3484–3497. <https://doi.org/10.1111/mec.14808>
- 540 Campbell Grant, E. H., Lowe, W. H., & Fagan, W. F. (2007). Living in the branches: population  
541 dynamics and ecological processes in dendritic networks. *Ecology letters*, *10*(2), 165–175.  
542 <https://doi.org/10.1111/j.1461-0248.2006.01007.x>
- 543 Capblancq, T., & Forester, B. R. (2021). Redundancy analysis: A Swiss Army Knife for landscape  
544 genomics. *Methods in Ecology and Evolution*, *12*(12), 2298–2309. <https://doi.org/10.1111/2041-210X.13722>
- 545
- 546 Chafin, T. K., Douglas, M. R., Martin, B. T., & Douglas, M. E. (2019). Hybridization drives genetic  
547 erosion in sympatric desert fishes of western North America. *Heredity*, *123*(6), 759–773.  
548 <https://doi.org/10.1038/s41437-019-0259-2>
- 549 Chan, K. O., & Brown, R. M. (2020). Elucidating the drivers of genetic differentiation in Malaysian  
550 torrent frogs (Anura: Ranidae: Amolops): A landscape genomics approach. *Zoological Journal of*  
551 *the Linnean Society*, *190*(1), 65–78. <https://doi.org/10.1093/zoolinnean/zlz151>
- 552 Chiu, M. C., Li, B., Nukazawa, K., Resh, V. H., Carvajal, T., & Watanabe, K. (2020). Branching  
553 networks can have opposing influences on genetic variation in riverine metapopulations. *Diversity*  
554 *and Distributions*, *26*(12), 1813–1824. <https://doi.org/10.1111/ddi.13160>
- 555 Comte, L., & Olden, J. D. (2018). Fish dispersal in flowing waters: A synthesis of movement and  
556 genetic-based studies. *Fish and Fisheries*, *19*, 1063–1077. <https://doi.org/10.1111/faf.12312>
- 557 Coombes, K. R., Wang, M., & Coombes, M. K. R. (2019). Package 'PCDimension'. Retrieved from:  
558 <https://cran.r-project.org/package=PCDimension>
- 559 Cushman, S. A., McKelvey, K. S., Hayden, J., & Schwartz, M. K. (2006). Gene flow in complex  
560 landscapes: Testing multiple hypotheses with causal modeling. *American Naturalist*, *168*(4), 486–  
561 499. <https://doi.org/10.1086/506976>
- 562 Cushman, S. A., Wasserman, T. N., Landguth, E. L., & Shirk, A. J. (2013). Re-evaluating causal  
563 modeling with mantel tests in landscape genetics. *Diversity*, *5*(1), 51–72.  
564 <https://doi.org/10.3390/d5010051>

- 565 da Fonseca, R. R., Albrechtsen, A., Themudo, G. E., Ramos-Madrugal, J., Sibbesen, J. A., Maretty, L.,  
566 Zepeda-Mendoza, M. L., Campos, P. F., Heller, R., & Pereira, R. J. (2016). Next-generation  
567 biology: Sequencing and data analysis approaches for non-model organisms. *Marine Genomics*, 30,  
568 3–13. <https://doi.org/10.1016/j.margen.2016.04.012>
- 569 Davis, C. D., Epps, C. W., Flitcroft, R. L., & Banks, M. A. (2018). Refining and defining riverscape  
570 genetics: How rivers influence population genetic structure. *Wiley Interdisciplinary Reviews:*  
571 *Water*, 5(2), e1269. <https://doi.org/10.1002/wat2.1269>
- 572 DeWoody, J. A., Harder, A. M., Mathur, S., & Willoughby, J. R. (2021). The long-standing significance  
573 of genetic diversity in conservation. *Molecular Ecology*, 30(17), 4147-4154.  
574 <https://doi.org/10.1111/mec.16051>
- 575 Douglas, M. R., Anthonysamy, W. J. B. Musmann, S. M., Davis, M. A., Louis, W. and Douglas, M. E.  
576 (2020). Multi-targeted management of upland game birds at the agroecosystem interface in  
577 midwestern North America. *PLoS ONE* 15(4), e0230735.  
578 <https://doi.org/10.1371/journal.pone.0230735>
- 579 Douglas, M. E., and Matthews, W. J. (1992). Does morphology predict ecology? Hypothesis testing  
580 within a freshwater stream fish assemblage. *Oikos*, 65(2), 213-224. <https://doi.org/10.2307/3545012>
- 581 Dray, S., Bauman, D., Blanchet, G., Borcard, D., Clappe, S., Guenard, G., Jombart, T., Larocque, G.,  
582 Legendre, P., & Wagner, H. (2020). R package "adespatial": Multivariate Multiscale Spatial  
583 Analysis. Retrieved from: <https://cran.r-project.org/package=adespatial>
- 584 Eaton, D. A. R., & Overcast, I. (2020). Ipyrad: Interactive assembly and analysis of RADseq datasets.  
585 *Bioinformatics*, 36(8), 2592–2594. <https://doi.org/10.1093/bioinformatics/btz966>
- 586 Excoffier, L., Smouse, P. E., & Quattro, J. M. (1992). Analysis of molecular variance inferred from  
587 metric distances among DNA haplotypes: Application to human mitochondrial DNA restriction  
588 data. *Genetics*, 131(2), 479–491. <https://doi.org/10.1093/genetics/131.2.479>
- 589 Fagan, W. F. (2002). Connectivity, fragmentation, and extinction risk in dendritic  
590 metapopulations. *Ecology*, 83(12), 3243-3249. [https://doi.org/10.1890/0012-9658\(2002\)083\[3243:CFAERI\]2.0.CO;2](https://doi.org/10.1890/0012-9658(2002)083[3243:CFAERI]2.0.CO;2)
- 591 Falke, J. A., Bailey, L. L., Fausch, K. D., & Bestgen, K. R. (2012). Colonization and extinction in  
592 dynamic habitats: an occupancy approach for a Great Plains stream fish assemblage. *Ecology*, 93(4),  
593 858-867. <https://doi.org/10.1890/11-1515.1>
- 594 Fetzner Jr, J. W., & DiStefano, R. J. (2008). Population genetics of an imperiled crayfish from the White  
595 River drainage of Missouri, USA. *Freshwater Crayfish*, 16, 131-146.
- 596 Finn, D. S., Bonada, N., Múrria, C., & Hughes, J. M. (2011). Small but mighty: Headwaters are vital to  
597 stream network biodiversity at two levels of organization. *Journal of the North American*  
598 *Benthological Society*, 30(4), 963–980. <https://doi.org/10.1899/11-012.1>
- 599 Fluker, B. L., Kuhajda, B. R., & Harris, P. M. (2014). The influence of life-history strategy on genetic  
600 differentiation and lineage divergence in darters (Percidae: Etheostomatinae). *Evolution*, 68(11),  
601 3199–3216. <https://doi.org/10.1111/evo.12505>
- 602 Frantz, A. C., Cellina, S., Krier, A., Schley, L., & Burke, T. (2009). Using spatial Bayesian methods to  
603 determine the genetic structure of a continuously distributed population: Clusters or isolation by  
604 distance? *Journal of Applied Ecology*, 46(2), 493–505. <https://doi.org/10.1111/j.1365-2664.2008.01606.x>
- 605 Frichot, E., & François, O. (2015). LEA: An R package for landscape and ecological association studies.  
606 *Methods in Ecology and Evolution*, 6(8), 925–929. <https://doi.org/10.1111/2041-210X.12382>
- 607 Frichot, E., Mathieu, F., Trouillon, T., Bouchard, G., & François, O. (2014). Fast and efficient estimation  
608 of individual ancestry coefficients. *Genetics*, 196(4), 973–983.  
609 <https://doi.org/10.1534/genetics.113.160572>
- 610 Goslee, S., & Urban, D. (2020). ecodist: Dissimilarity-based functions for ecological analysis. Retrieved  
611 from: <https://cran.r-project.org/package=ecodist>
- 612 Gosselin, T. (2020). R package radiator: RADseq Data Exploration, Manipulation and Visualization using  
613 R. Retrieved from: <https://thierrygosselin.github.io/radiator/>
- 614  
615

- 616 Goudet, J., Jombart, T., Kamvar, Z. N., Archer, E., & Hardy, O. (2017). hierfstat: estimation and tests of  
617 hierarchical F-statistics. Retrieved from: <https://cran.r-project.org/package=hierfstat>
- 618 Guillot, G., Leblois, R., Coulon, A., & Frantz, A. C. (2009). Statistical methods in spatial genetics.  
619 *Molecular Ecology*, 18(23), 4734–4756. <https://doi.org/10.1111/j.1365-294X.2009.04410.x>
- 620 Hansen, M. M., Limborg, M. T., Ferchaud, A. L., & Pujolar, J. M. (2014). The effects of medieval dams  
621 on genetic divergence and demographic history in brown trout populations. *BMC Evolutionary*  
622 *Biology*, 14(1), 1–14. <https://doi.org/10.1186/1471-2148-14-122>
- 623 Harrisson, K. A., Pavlova, A., Telonis-Scott, M., & Sunnucks, P. (2014). Using genomics to characterize  
624 evolutionary potential for conservation of wild populations. *Evolutionary Applications*, 7(9), 1008–  
625 1025. <https://doi.org/10.1111/eva.12149>
- 626 Holderegger, R., Kamm, U., & Gugerli, F. (2006). Adaptive vs. neutral genetic diversity: implications for  
627 landscape genetics. *Landscape Ecology*, 21(6), 797–807. <https://doi.org/10.1007/s10980-005-5245-9>
- 628 Hopken, M. W., Douglas, M. R., & Douglas, M. E. (2013). Stream hierarchy defines riverscape genetics  
629 of a North American desert fish. *Molecular Ecology*, 22(4), 956–971.  
630 <https://doi.org/10.1111/mec.12156>
- 631 Hotaling, S., Giersch, J. J., Finn, D. S., Tronstad, L. M., Jordan, S., Serpa, L. E., ... & Weisrock, D. W.  
632 (2019). Congruent population genetic structure but differing depths of divergence for three alpine  
633 stoneflies with similar ecology and geographic distributions. *Freshwater Biology*, 64(2), 335–347.  
634 <https://doi.org/10.1111/fwb.13223>
- 635 Huber, P. R., Greco, S. E., & Thorne, J. H. (2010). Spatial scale effects on conservation network design:  
636 Trade-offs and omissions in regional versus local scale planning. *Landscape Ecology*, 25(5), 683–  
637 695. <https://doi.org/10.1007/s10980-010-9447-4>
- 638 Hubert, M., Reynkens, T., Schmitt, E., & Verdonck, T. (2016). Sparse PCA for High-Dimensional Data  
639 With Outliers. *Technometrics*, 58(4), 424–434. <https://doi.org/10.1080/00401706.2015.1093962>
- 640 Hubert, M., Rousseeuw, P. J., & Vanden Branden, K. (2005). ROBPCA: A new approach to robust  
641 principal component analysis. *Technometrics*, 47(1), 64–79.  
642 <https://doi.org/10.1198/004017004000000563>
- 643 Hughes, J. M., Schmidt, D. J., & Finn, D. S. (2009). Genes in Streams: Using DNA to Understand the  
644 Movement of Freshwater Fauna and Their Riverine Habitat. *BioScience*, 59(7), 573–583.  
645 <https://doi.org/10.1525/bio.2009.59.7.8>
- 646 Husemann, M., Ray, J. W., King, R. S., Hooser, E. A., & Danley, P. D. (2012). Comparative  
647 biogeography reveals differences in population genetic structure of five species of stream fishes.  
648 *Biological Journal of the Linnean Society*, 107(4), 867–885. <https://doi.org/10.1111/j.1095-8312.2012.01973.x>
- 649
- 650 Hutchings, J. A., Myers, R. A., García, V. B., Lucifora, L. O., & Kuparinen, A. (2012). Life history  
651 correlates of extinction risk and recovery potential. *Ecological Applications*, 22(4), 1061–1067.  
652 <https://doi.org/10.1890/11-1313.1>
- 653 Jorgensen, D. J. (1993) Paleohydrology of the Central United States. *U.S. Geological Survey Bulletin*,  
654 1989-D, 1-32. <https://doi.org/10.3133/b1989D>
- 655 Jost, L. (2008). GST and its relatives do not measure differentiation. *Molecular Ecology*, 17(18), 4015–  
656 4026. <https://doi.org/10.1111/j.1365-294X.2008.03887.x>
- 657 Kamvar, Z. N., Brooks, J. C., & Grünwald, N. J. (2015). Novel R tools for analysis of genome-wide  
658 population genetic data with emphasis on clonality. *Frontiers in Genetics*, 6, 208.  
659 <https://doi.org/10.3389/fgene.2015.00208>
- 660 Labonne, J., Ravigné, V., Parisi, B., & Gaucherel, C. (2008). Linking dendritic network structures to  
661 population demogenetics: the downside of connectivity. *Oikos*, 117(10), 1479–1490.  
662 <https://doi.org/10.1111/j.0030-1299.2008.16976.x>
- 663 Laikre, L. (2010). Genetic diversity is overlooked in international conservation policy implementation.  
664 *Conservation Genetics*, 11(2), 349–354. <https://doi.org/10.1007/s10592-009-0037-4>
- 665 Lawson, D. J., Davies, N. M., Haworth, S., Ashraf, B., Howe, L., Crawford, A., Hemani, G., Smith, G.  
666 D., & Timpson, N. J. (2020). Is population structure in the genetic biobank era irrelevant, a



- 667 challenge, or an opportunity? *Human Genetics*, 139, 23-41. [https://doi.org/10.1007/s00439-019-](https://doi.org/10.1007/s00439-019-02014-8)  
668 [02014-8](https://doi.org/10.1007/s00439-019-02014-8)
- 669 Lee, S. R., Jo, Y. S., Park, C. H., Friedman, J. M., & Olson, M. S. (2018). Population genomic analysis  
670 suggests strong influence of river network on spatial distribution of genetic variation in invasive  
671 saltcedar across the southwestern United States. *Molecular Ecology*, 27(3), 636–646.  
672 <https://doi.org/10.1111/mec.14468>
- 673 Leonard, P. B., Baldwin, R. F., & Hanks, R. D. (2017). Landscape-scale conservation design across biotic  
674 realms: Sequential integration of aquatic and terrestrial landscapes. *Scientific Reports*, 7(1), 1–12.  
675 <https://doi.org/10.1038/s41598-017-15304-w>
- 676 Linke, S., Lehner, B., Ouellet Dallaire, C., Ariwi, J., Grill, G., Anand, M., Beames, P., Burchard-Levine,  
677 V., Maxwell, S., Moidu, H., Tan, F., & Thieme, M. (2019). Global hydro-environmental sub-basin  
678 and river reach characteristics at high spatial resolution. *Scientific Data*, 6(1), 1–15.  
679 <https://doi.org/10.1038/s41597-019-0300-6>
- 680 Lowe, W. H., Likens, G. E., McPeck, M. A., & Buso, D. C. (2006). Linking direct and indirect data on  
681 dispersal: Isolation by slope in a headwater stream salamander. *Ecology*, 87(2), 334–339.  
682 <https://doi.org/10.1890/05-0232>
- 683 Mantel, N., & Valand, R. S. (1970). A Technique of Nonparametric Multivariate Analysis. *Biometrics*,  
684 26(3), 547. <https://doi.org/10.2307/2529108>
- 685 Matthews, W.J. (1998). *Patterns in Freshwater Fish Ecology*. New York: Chapman and Hall.
- 686 Matthews, W. J., & Robison, H. W. (1988). The Distribution of the Fishes of Arkansas: A Multivariate  
687 Analysis. *Copeia*, 1988(2), 358. <https://doi.org/10.2307/1445876>
- 688 Matthews, W. J., & Robison, H. W. (1998). Influence of drainage connectivity, drainage area and regional  
689 species richness on fishes of the interior highlands in Arkansas. *American Midland Naturalist*,  
690 139(1), 1–19. [https://doi.org/10.1674/0003-0031\(1998\)139\[0001:IODCDA\]2.0.CO;2](https://doi.org/10.1674/0003-0031(1998)139[0001:IODCDA]2.0.CO;2)
- 691 Mayden, R. L. (1985). Biogeography of Ouachita Highland Fishes. *The Southwestern Naturalist*, 30(2),  
692 195–211. <https://doi.org/10.2307/3670734>
- 693 Mayden, R. L. (1988). Vicariance biogeography, parsimony, and evolution in North American freshwater  
694 fishes. *Systematic Biology*, 37(4), 329–355. <https://doi.org/10.1093/sysbio/37.4.329>
- 695 Meffe, G.K., & Vrijenhoek, R. C. (1988). Conservation Genetics in the Management of Desert Fishes.  
696 *Conservation Biology*, 2(2), 157–169. <https://doi.org/10.1111/j.1523-1739.1988.tb00167.x>
- 697 Meirmans, P. G. (2012). The trouble with isolation by distance. *Molecular Ecology*, 21(12), 2839–2846.  
698 <https://doi.org/10.1111/j.1365-294X.2012.05578.x>
- 699 Meirmans, P. G., & Hedrick, P. W. (2011). Assessing population structure: FST and related measures.  
700 *Molecular Ecology Resources*, 11(1), 5–18. <https://doi.org/10.1111/j.1755-0998.2010.02927.x>
- 701 Naimi, B. (2013). R package usdm: Uncertainty analysis for species distribution models. Retrieved from:  
702 <https://cran.r-project.org/package=usdm>
- 703 Nazareno, A. G., Bemmels, J. B., Dick, C. W., & Lohmann, L. G. (2017). Minimum sample sizes for  
704 population genomics: an empirical study from an Amazonian plant species. *Molecular Ecology*  
705 *Resources*, 17(6), 1136–1147. <https://doi.org/10.1111/1755-0998.12654>
- 706 Nei, M. (1973). Analysis of Gene Diversity in Subdivided Populations. *Proceedings of the National*  
707 *Academy of Sciences*. <https://doi.org/10.1073/pnas.70.12.3321>
- 708 Nei, M., & Tajima, F. (1981). Genetic drift and estimation of effective population size. *Genetics*, 98(3),  
709 625–640. <https://doi.org/10.1093/genetics/98.3.625>
- 710 Oaks, J. R. (2019). Full bayesian comparative phylogeography from genomic data. *Systematic Biology*,  
711 68(3), 371-395. <https://doi.org/10.1093/sysbio/syy063>
- 712 Oksanen, A. J., Blanchet, F. G., Friendly, M., Kindt, R., Legendre, P., Mcglinn, D., Minchin, P. R.,  
713 O'Hara, R. B., Simpson, G. L., Solymos, P., Stevens, M. H. H., Szoecs, E., Wagner, H. (2020). R  
714 package vegan: community ecology package. Retrieved from [https://cran.r-](https://cran.r-project.org/package=vegan)  
715 [project.org/package=vegan](https://cran.r-project.org/package=vegan)
- 716 Olden, J. D., Poff, N. L., & Bestgen, K. R. (2008). Trait synergisms and the rarity, extirpation, and  
717 extinction risk of desert fishes. *Ecology*, 89(3), 847-856. <https://doi.org/10.1890/06-1864.1>

- 718 Paradis, E. (2010). Pegas: An R package for population genetics with an integrated-modular approach.  
719 *Bioinformatics*, 26(3), 419–420. <https://doi.org/10.1093/bioinformatics/btp696>
- 720 Pavlova, A., Beheregaray, L. B., Coleman, R., Gilligan, D., Harrisson, K. A., Ingram, B. A., Kearns, J.,  
721 Lamb, A. M., Lintermans, M., Lyon, J., Nguyen, T. T. T., Sasaki, M., Tonkin, Z., Yen, J. D. L., &  
722 Sunnucks, P. (2017). Severe consequences of habitat fragmentation on genetic diversity of an  
723 endangered Australian freshwater fish: A call for assisted gene flow. *Evolutionary Applications*,  
724 10(6), 531–550. <https://doi.org/10.1111/eva.12484>
- 725 Paz-Vinas, I., Loot, G., Hermoso, V., Veyssi re, C., Poulet, N., Grenouillet, G., & Blanchet, S. (2018).  
726 Systematic conservation planning for intraspecific genetic diversity. *Proceedings of the Royal*  
727 *Society B: Biological Sciences*, 285(1877). <https://doi.org/10.1098/rspb.2017.2746>
- 728 Pearson, R. G., Stanton, J. C., Shoemaker, K. T., Aiello-Lammens, M. E., Ersts, P. J., Horning, N.,  
729 Fordham, D. A., Raxworthy, C. J., Ryu, H. Y., McNees, J., & Ak akaya, H. R. (2014). Life history  
730 and spatial traits predict extinction risk due to climate change. *Nature Climate Change*, 4(3), 217–  
731 221. <https://doi.org/10.1038/nclimate2113>
- 732 Peres-Neto, P. R., Jackson, D. A., & Somers, K. M. (2005). How many principal components? Stopping  
733 rules for determining the number of non-trivial axes revisited. *Computational Statistics & Data*  
734 *Analysis*, 49(4), 974–997. <https://doi.org/10.1016/j.csda.2004.06.015>
- 735 Perez, M. F., Franco, F. F., Bombonato, J. R., Bonatelli, I. A. S., Khan, G., Romeiro-Brito, M., Fegies, A.  
736 C., Ribeiro, P. M., Silva, G. A. R., & Moraes, E. M. (2018). Assessing population structure in the  
737 face of isolation by distance: Are we neglecting the problem? *Diversity and Distributions*, 24(12),  
738 1883–1889. <https://doi.org/10.1111/ddi.12816>
- 739 Peterson, B. K., Weber, J. N., Kay, E. H., Fisher, H. S., & Hoekstra, H. E. (2012). Double digest  
740 RADseq: An inexpensive method for de novo SNP discovery and genotyping in model and non-  
741 model species. *PLoS ONE*, 7(5), e37135. <https://doi.org/10.1371/journal.pone.0037135>
- 742 Peterson, E. E., Ver Hoef, J. M., Isaak, D. J., Falke, J. A., Fortin, M. J., Jordan, C. E., McNyset, K.,  
743 Monestiez, P., Ruesch, A. S., Sengupta, A., Som, N., Steel, E. A., Theobald, D. M., Torgersen, C.  
744 E., & Wenger, S. J. (2013). Modelling dendritic ecological networks in space: An integrated  
745 network perspective. *Ecology Letters*, 16(5), 707–719. <https://doi.org/10.1111/ele.12084>
- 746 Pilger, T. J., Gido, K. B., Propst, D. L., Whitney, J. E., & Turner, T. F. (2017). River network  
747 architecture, genetic effective size and distributional patterns predict differences in genetic structure  
748 across species in a dryland stream fish community. *Molecular Ecology*, 26(10), 2687–2697.  
749 <https://doi.org/10.1111/mec.14079>
- 750 Radinger, J., & Wolter, C. (2015). Disentangling the effects of habitat suitability, dispersal, and  
751 fragmentation on the distribution of river fishes. *Ecological Applications*, 25(4), 914–927.  
752 <https://doi.org/10.1890/14-0422.1>
- 753 Riginos, C., Buckley, Y. M., Blomberg, S. P., & Tremblay, E. A. (2014). Dispersal Capacity Predicts Both  
754 Population Genetic Structure and Species Richness in Reef Fishes. *The American Naturalist*, 184(1),  
755 52–64. <https://doi.org/10.1086/676505>
- 756 Roberts, J. H., Angermeier, P. L., & Hallerman, E. M. (2013). Distance, dams and drift: What structures  
757 populations of an endangered, benthic stream fish? *Freshwater Biology*, 58(10), 2050–2064.  
758 <https://doi.org/10.1111/fwb.12190>
- 759 Robison, H. W., & Buchanan, T. M. (2020). *Fishes of Arkansas* (2nd ed.). Fayetteville, AR: University of  
760 Arkansas Press.
- 761 Rosenberg, N. A., Mahajan, S., Ramachandran, S., Zhao, C., Pritchard, J. K., & Feldman, M. W. (2005).  
762 Clines, clusters, and the effect of study design on the inference of human population structure. *PLoS*  
763 *Genetics*, 1(6), 0660–0671. <https://doi.org/10.1371/journal.pgen.0010070>
- 764 Rousset, F. (1997). Genetic differentiation and estimation of gene flow from F-statistics under isolation  
765 by distance. *Genetics*, 145(4), 1219–1228. <https://doi.org/10.1006/bijl.1996.0127>
- 766 Ruiz-Gonzalez, A., Cushman, S. A., Madeira, M. J., Randi, E., & G omez-Moliner, B. J. (2015). Isolation  
767 by distance, resistance and/or clusters? Lessons learned from a forest-dwelling carnivore inhabiting  
768 a heterogeneous landscape. *Molecular Ecology*, 24(20), 5110–5129.

- 769 <https://doi.org/10.1111/mec.13392>
- 770 Ruzich, J., Turnquist, K., Nye, N., Rowe, D., & Larson, W. A. (2019). Isolation by a hydroelectric dam  
771 induces minimal impacts on genetic diversity and population structure in six fish species.  
772 *Conservation Genetics*, 20(6), 1421–1436. <https://doi.org/10.1007/s10592-019-01220-1>
- 773 Schmidt, B. V., & Schaefer, J. (2018). Ecological and landscape effects on genetic distance in an  
774 assemblage of headwater fishes. *Ecology of Freshwater Fish*, 27(2), 617–631.  
775 <https://doi.org/10.1111/eff.12375>
- 776 Shelley, J. J., Holland, O. J., Swearer, S. E., Dempster, T., Le, M. C., Craig, F., & Miller, A. D. (2021).  
777 Landscape context and dispersal ability as determinants of population genetic structure in freshwater  
778 fishes. *Freshwater Biology*, 67(2), 338–352. <https://doi.org/10.1111/fwb.13844>
- 779 Singhal, S., Huang, H., Grundler, M. R., Marchán-Rivadeneira, M. R., Holmes, I., Title, P. O., Donnellan,  
780 S. C., & Rabosky, D. L. (2018). Does Population Structure Predict the Rate of Speciation? A  
781 Comparative Test across Australia's Most Diverse Vertebrate Radiation. *The American Naturalist*,  
782 192(4), 432–447. <https://doi.org/10.1086/699515>
- 783 Strange, R. M., & Burr, B. M. (1997). Intraspecific phylogeography of North American highland fishes:  
784 A test of the Pleistocene vicariance hypothesis. *Evolution*, 51(3), 885–897.  
785 <https://doi.org/10.1111/j.1558-5646.1997.tb03670.x>
- 786 Thomaz, A. T., Christie, M. R., & Knowles, L. L. (2016). The architecture of river networks can drive the  
787 evolutionary dynamics of aquatic populations. *Evolution*, 70(3), 731–739.  
788 <https://doi.org/10.1111/evo.12883>
- 789 Turner, T. F., & Robison, H. W. (2006). Genetic diversity of the Caddo madtom, *Noturus taylori*, with  
790 comments on factors that promote genetic divergence in fishes endemic to the Ouachita Highlands.  
791 *Southwestern Naturalist*, 51(3), 338–345. [https://doi.org/10.1894/0038-  
792 4909\(2006\)51\[338:GDOTCM\]2.0.CO;2](https://doi.org/10.1894/0038-4909(2006)51[338:GDOTCM]2.0.CO;2)
- 793 Tyers, M. (2017). Riverdist: River Network Distance Computation and Applications. Retrieved from:  
794 <https://cran.r-project.org/package=riverdist>
- 795 USGS (2021). Watershed Boundary Dataset. Retrieved from: [https://www.usgs.gov/national-  
796 hydrography/watershed-boundary-dataset](https://www.usgs.gov/national-hydrography/watershed-boundary-dataset). Accessed: 1 December 2021.
- 797 USGS, & USDA-NRCS. (2013). Federal standards and procedures for the national Watershed Boundary  
798 Dataset (WBD). In *U.S. Geological Survey, Techniques and Methods* (4th ed.).
- 799 Wang, I. J., & Bradburd, G. S. (2014). Isolation by environment. *Molecular Ecology*, 23(23), 5649–5662.  
800 <https://doi.org/10.1111/mec.12938>
- 801 Warren, M. L., Burr, B. M., Walsh, S. J., Bart, H. L., Cashner, R. C., Etnier, D. A., Freeman, B. J.,  
802 Kuhajda, B. R., Mayden, R. L., Robison, H. W., Ross, S. T., & Starnes, W. C. (2000). Diversity,  
803 Distribution, and Conservation Status of the Native Freshwater Fishes of the Southern United States.  
804 *Fisheries*, 25(10), 7–31. [https://doi.org/10.1577/1548-8446\(2000\)025<0007:ddacso>2.0.co;2](https://doi.org/10.1577/1548-8446(2000)025<0007:ddacso>2.0.co;2)
- 805 Weir, B. S., & Cockerham, C. C. (1984). Estimating F-statistics for the analysis of population structure.  
806 *Evolution*, 38(6), 1358–1370. <https://doi.org/10.1111/j.1558-5646.1984.tb05657.x>
- 807 White, S. L., Hanks, E. M., & Wagner, T. (2020). A novel quantitative framework for riverscape genetics.  
808 *Ecological Applications*, 30(7), 1–17. <https://doi.org/10.1002/eap.2147>
- 809 Willing, E. M., Dreyer, C., & van Oosterhout, C. (2012). Estimates of genetic differentiation measured by  
810 *fst* do not necessarily require large sample sizes when using many snp markers. *PLoS ONE*, 7(8),  
811 e42649. <https://doi.org/10.1371/journal.pone.0042649>
- 812 Winter, D. J. (2012). MMOD: An R library for the calculation of population differentiation statistics.  
813 *Molecular Ecology Resources*, 12(6), 1158–1160. <https://doi.org/10.1111/j.1755-0998.2012.03174.x>
- 814 Wright, S. (1943). Isolation by Distance. *Genetics*, 28(2), 114–138.
- 815 Zbinden, Z. D., Douglas, M. R., Chafin, T. K., & Douglas, M. E. (2022). A community genomics  
816 approach to natural hybridization. Manuscript submitted for publication.
- 817 Zbinden, Z. D., Geheber, A. D., Lehrter, R. J., & Matthews, W. J. (2022). Multifaceted assessment of  
818 stream fish alpha and beta diversity using spatial models. *Hydrobiologia*, 849, 1795–1820.  
819 <https://doi.org/10.1007/s10750-022-04824-w>

- 820 Zbinden, Z. D., Geheber, A. D., Matthews, W. J., & Marsh-Matthews, E. (2022). Fish communities,  
821 species of greatest conservation need, and protected areas in southeastern Oklahoma, 2014-2016.  
822 *Proceedings of the Oklahoma Academy of Science* 2, 101, 14–32.  
823 Zbinden, Z. D., & Matthews, W. J. (2017). Beta diversity of stream fish assemblages: partitioning  
824 variation between spatial and environmental factors. *Freshwater Biology*, 62(8), 1460–1471.  
825 <https://doi.org/10.1111/fwb.12960>

826 **CONFLICT OF INTEREST**

827 The authors declare that they have no competing interests.

828

829 **AUTHOR CONTRIBUTIONS**

830 ZDZ conceived the research with input from all authors. Specimen collection was done by ZDZ & TKC.

831 ZDZ did laboratory work, bioinformatics, data analysis, and manuscript drafting. All authors contributed

832 to interpretation of results, formulating conclusions, and critically revising the manuscript. MRD and

833 MED administered funding through their University of Arkansas Endowments.

834

835 **TABLE 1** Fish species ( $N=31$ ) were collected at 75 sampling locations across the White River Basin of  
 836 the Ozark Mountains, U.S.A. Summary data are tabulated for  $N=2,861$  individuals across seven families  
 837 genotyped and analyzed for genetic structure. Family=fish family; Species=species name; NI=number of  
 838 individuals analyzed after filtering; NS=number of sites at which filtered individuals occurred;  
 839 NI/S=mean number of individuals per site; Reads=mean number of raw reads recovered by Illumina  
 840 HiSeq; Loci=mean number of loci recovered by iPyrad; Depth=mean coverage of loci; Ho=mean  
 841 observed heterozygosity; SNPs=number of single nucleotide polymorphisms in the analyzed data panel;  
 842 Miss=mean missing data; and PCs=number of principal components used to characterize neutral genetic  
 843 variation and PCvar=the original genetic variance explained by the set of PCs.  
 844

| Family         | Species                        | NI   | NS   | NI/S | Reads     | Loci    | Depth | Ho     | SNPs   | Miss | PCs  | PCvar |
|----------------|--------------------------------|------|------|------|-----------|---------|-------|--------|--------|------|------|-------|
| Atherinopsidae | <i>Labidesthes sicculus</i>    | 99   | 18   | 5.5  | 2401513   | 19532   | 83    | 0.0013 | 2956   | 0.11 | 17   | 40.2  |
|                | <i>Lepomis macrochirus</i>     | 63   | 17   | 3.7  | 2369445   | 26142   | 61    | 0.0028 | 5873   | 0.14 | 19   | 45.5  |
| Centrarchidae  | <i>Lepomis megalotis</i>       | 242  | 44   | 5.5  | 2330434   | 25126   | 59    | 0.0036 | 4841   | 0.13 | 48   | 45.2  |
|                | <i>Micropterus dolomieu</i>    | 56   | 15   | 3.7  | 2014858   | 21420   | 58    | 0.0018 | 2813   | 0.11 | 11   | 32.6  |
|                | <i>Micropterus salmoides</i>   | 15   | 7    | 2.1  | 2338155   | 22827   | 65    | 0.0018 | 2825   | 0.06 | 7    | 59.4  |
| Cottidae       | <i>Cottus carolinae</i>        | 24   | 9    | 2.7  | 2973760   | 27523   | 74    | 0.0012 | 5798   | 0.12 | 5    | 61.6  |
|                | <i>Cottus hypselurus</i>       | 40   | 8    | 5.0  | 3226846   | 28108   | 76    | 0.0015 | 7116   | 0.11 | 5    | 75.1  |
| Fundulidae     | <i>Fundulus catenatus</i>      | 112  | 23   | 4.9  | 2757508   | 30509   | 52    | 0.0014 | 3378   | 0.13 | 18   | 46.0  |
|                | <i>Fundulus olivaceus</i>      | 131  | 24   | 5.5  | 2647685   | 27631   | 51    | 0.0025 | 3111   | 0.14 | 22   | 42.6  |
|                | <i>Campostoma anomalum</i>     | 93   | 20   | 4.7  | 2226556   | 16753   | 77    | 0.0036 | 3187   | 0.13 | 10   | 36.7  |
|                | <i>Campostoma oligolepis</i>   | 119  | 31   | 3.8  | 2038589   | 16107   | 76    | 0.0030 | 3121   | 0.12 | 40   | 44.7  |
|                | <i>Chrosomus erythrogaster</i> | 53   | 7    | 7.6  | 2180045   | 16508   | 73    | 0.0033 | 3440   | 0.14 | 6    | 55.8  |
|                | <i>Cyprinella galactura</i>    | 72   | 10   | 7.2  | 1648530   | 14839   | 72    | 0.0029 | 3322   | 0.11 | 27   | 52.1  |
|                | <i>Cyprinella whipplei</i>     | 29   | 6    | 4.8  | 1870427   | 14599   | 84    | 0.0033 | 2847   | 0.12 | 8    | 39.5  |
|                | <i>Luxilus chrysocephalus</i>  | 57   | 13   | 4.4  | 1677176   | 15089   | 68    | 0.0025 | 2168   | 0.14 | 17   | 47.2  |
| Leuciscidae    | <i>Luxilus pilsbryi</i>        | 244  | 31   | 7.9  | 2028625   | 16063   | 81    | 0.0033 | 4922   | 0.14 | 93   | 52.1  |
|                | <i>Luxilus zonatus</i>         | 98   | 16   | 6.1  | 2273167   | 16964   | 89    | 0.0030 | 5496   | 0.12 | 12   | 24.7  |
|                | <i>Lythrurus umbratilis</i>    | 23   | 5    | 4.6  | 1970516   | 16465   | 68    | 0.0032 | 2491   | 0.12 | 6    | 40.3  |
|                | <i>Notropis boops</i>          | 233  | 28   | 8.3  | 2355581   | 15684   | 104   | 0.0040 | 6161   | 0.11 | 71   | 43.8  |
|                | <i>Notropis nubilus</i>        | 191  | 32   | 6.0  | 2087695   | 15544   | 81    | 0.0040 | 4018   | 0.14 | 65   | 46.3  |
|                | <i>Notropis percobromus</i>    | 62   | 10   | 6.2  | 2082050   | 17852   | 74    | 0.0047 | 4393   | 0.13 | 36   | 65.6  |
|                | <i>Notropis telescopus</i>     | 81   | 13   | 6.2  | 2092015   | 16154   | 85    | 0.0024 | 4741   | 0.11 | 12   | 31.2  |
|                | <i>Pimephales notatus</i>      | 47   | 13   | 3.6  | 2106907   | 15271   | 92    | 0.0029 | 4022   | 0.13 | 11   | 49.3  |
|                | <i>Semotilus atromaculatus</i> | 30   | 9    | 3.3  | 2216336   | 15406   | 84    | 0.0020 | 2644   | 0.15 | 2    | 63.6  |
|                | <i>Etheostoma blennioides</i>  | 52   | 14   | 3.7  | 2491915   | 21416   | 71    | 0.0024 | 5124   | 0.11 | 2    | 36.4  |
| Percidae       | <i>Etheostoma caeruleum</i>    | 358  | 50   | 7.2  | 2170268   | 21900   | 62    | 0.0044 | 3511   | 0.13 | 20   | 28.7  |
|                | <i>Etheostoma flabellare</i>   | 22   | 6    | 3.7  | 2288120   | 21041   | 62    | 0.0015 | 9927   | 0.08 | 4    | 88.7  |
|                | <i>Etheostoma juliae</i>       | 57   | 10   | 5.7  | 2513876   | 20652   | 84    | 0.0014 | 5473   | 0.1  | 7    | 39.5  |
|                | <i>Etheostoma spectabile</i>   | 49   | 10   | 4.9  | 2565769   | 23873   | 64    | 0.0051 | 5519   | 0.15 | 6    | 33.6  |
|                | <i>Etheostoma zonale</i>       | 74   | 15   | 4.9  | 2364158   | 21514   | 74    | 0.0033 | 10033  | 0.13 | 5    | 24.9  |
| Poeciliidae    | <i>Gambusia affinis</i>        | 35   | 8    | 4.4  | 2657603   | 24021   | 78    | 0.0021 | 3818   | 0.09 | 9    | 39.9  |
|                | MEAN                           | 92.3 | 16.8 | 5.1  | 2289230.0 | 20081.7 | 73.6  | 0.0028 | 4486.7 | 0.12 | 20.0 | 46.2  |
|                | STDEV                          | 80.8 | 11.2 | 1.5  | 341159.5  | 4697.6  | 12.0  | 0.0010 | 1931.1 | 0.02 | 22.1 | 14.3  |

845 **TABLE 2** Summary of genetic structure observed for  $N=31$  species of fish collected across the White  
 846 River Basin, U.S.A. Classifications to family and species are provided for each, along with summaries of  
 847 genetic structure:  $H_T$ =total heterozygosity;  $H_S$ =within-site heterozygosity;  $G_{ST}$ =Nei's fixation index;  $G''_{ST}$   
 848 =unbiased fixation index;  $D$ =Jost's genetic differentiation; IBD=significant tests of isolation by distance  
 849 denoted "X"; Structure=whether the species could be subdivided into more than one population, denoted  
 850 "X"; Model=the isolation model explaining the most individual genetic variance; and Model Var=the  
 851 amount of variance explained by the best isolation model. Species are ordered by Jost's  $D$ .

852

| Family         | Species                        | $H_T$ | $H_S$ | $G_{ST}$ | $G''_{ST}$ | $D$  | IBD | Structure | Model            | Model Var |
|----------------|--------------------------------|-------|-------|----------|------------|------|-----|-----------|------------------|-----------|
| Percidae       | <i>Etheostoma flabellare</i>   | 0.35  | 0.02  | 0.93     | 0.96       | 0.40 | -   | X         | stream hierarchy | 99%       |
| Leuciscidae    | <i>Semotilus atromaculatus</i> | 0.30  | 0.09  | 0.70     | 0.79       | 0.26 | X   | X         | stream hierarchy | 91%       |
| Cottidae       | <i>Cottus hypselurus</i>       | 0.24  | 0.07  | 0.73     | 0.81       | 0.22 | -   | X         | stream hierarchy | 99%       |
| Leuciscidae    | <i>Chrosomus erythrogaster</i> | 0.27  | 0.11  | 0.59     | 0.71       | 0.21 | X   | X         | stream hierarchy | 98%       |
| Cottidae       | <i>Cottus carolinae</i>        | 0.26  | 0.11  | 0.58     | 0.69       | 0.19 | X   | X         | stream hierarchy | 93%       |
| Leuciscidae    | <i>Campostoma anomalum</i>     | 0.20  | 0.12  | 0.38     | 0.45       | 0.09 | X   | X         | stream hierarchy | 87%       |
| Percidae       | <i>Etheostoma blennioides</i>  | 0.21  | 0.13  | 0.35     | 0.43       | 0.09 | X   | X         | stream hierarchy | 98%       |
| Leuciscidae    | <i>Pimephales notatus</i>      | 0.25  | 0.18  | 0.28     | 0.36       | 0.09 | X   | X         | stream hierarchy | 98%       |
| Percidae       | <i>Etheostoma juliae</i>       | 0.23  | 0.16  | 0.29     | 0.37       | 0.09 | X   | X         | stream hierarchy | 97%       |
| Leuciscidae    | <i>Lythrurus umbratilis</i>    | 0.30  | 0.25  | 0.17     | 0.27       | 0.09 | -   | -         | stream hierarchy | 69%       |
| Percidae       | <i>Etheostoma spectabile</i>   | 0.20  | 0.14  | 0.31     | 0.38       | 0.08 | X   | X         | stream hierarchy | 99%       |
| Fundulidae     | <i>Fundulus olivaceus</i>      | 0.24  | 0.18  | 0.25     | 0.32       | 0.08 | X   | X         | stream hierarchy | 88%       |
| Fundulidae     | <i>Fundulus catenatus</i>      | 0.20  | 0.14  | 0.31     | 0.37       | 0.07 | X   | X         | stream hierarchy | 83%       |
| Atherinopsidae | <i>Labidesthes sicculus</i>    | 0.18  | 0.14  | 0.24     | 0.29       | 0.05 | X   | X         | stream hierarchy | 84%       |
| Leuciscidae    | <i>Notropis telescopus</i>     | 0.20  | 0.16  | 0.20     | 0.25       | 0.05 | X   | X         | stream hierarchy | 60%       |
| Percidae       | <i>Etheostoma caeruleum</i>    | 0.14  | 0.10  | 0.27     | 0.30       | 0.04 | X   | X         | stream hierarchy | 90%       |
| Percidae       | <i>Etheostoma zonale</i>       | 0.16  | 0.13  | 0.20     | 0.25       | 0.04 | X   | X         | stream hierarchy | 98%       |
| Leuciscidae    | <i>Luxilus chrysocephalus</i>  | 0.26  | 0.23  | 0.11     | 0.15       | 0.04 | X   | X         | stream hierarchy | 38%       |
| Centrarchidae  | <i>Lepomis megalotis</i>       | 0.18  | 0.15  | 0.17     | 0.21       | 0.04 | X   | X         | stream hierarchy | 47%       |
| Poeciliidae    | <i>Gambusia affinis</i>        | 0.26  | 0.24  | 0.10     | 0.14       | 0.04 | X   | X         | stream hierarchy | 59%       |
| Leuciscidae    | <i>Cyprinella whipplei</i>     | 0.26  | 0.24  | 0.09     | 0.14       | 0.04 | X   | X         | stream hierarchy | 50%       |
| Centrarchidae  | <i>Micropterus salmoides</i>   | 0.30  | 0.28  | 0.06     | 0.10       | 0.03 | X   | -         | stream hierarchy | 12%       |
| Leuciscidae    | <i>Luxilus zonatus</i>         | 0.19  | 0.17  | 0.11     | 0.14       | 0.03 | -   | X         | stream hierarchy | 76%       |
| Centrarchidae  | <i>Lepomis macrochirus</i>     | 0.24  | 0.22  | 0.07     | 0.10       | 0.02 | -   | -         | stream hierarchy | 19%       |
| Centrarchidae  | <i>Micropterus dolomieu</i>    | 0.23  | 0.22  | 0.07     | 0.10       | 0.02 | X   | -         | stream hierarchy | 57%       |
| Leuciscidae    | <i>Notropis boops</i>          | 0.17  | 0.16  | 0.06     | 0.08       | 0.01 | X   | X         | stream hierarchy | 23%       |
| Leuciscidae    | <i>Notropis nubilus</i>        | 0.14  | 0.13  | 0.07     | 0.08       | 0.01 | X   | X         | stream hierarchy | 13%       |
| Leuciscidae    | <i>Campostoma oligolepis</i>   | 0.17  | 0.16  | 0.05     | 0.06       | 0.01 | X   | X         | stream hierarchy | 15%       |
| Leuciscidae    | <i>Cyprinella galactura</i>    | 0.18  | 0.18  | 0.04     | 0.05       | 0.01 | -   | -         | stream hierarchy | 12%       |
| Leuciscidae    | <i>Notropis percobromus</i>    | 0.18  | 0.18  | 0.03     | 0.04       | 0.01 | X   | -         | stream hierarchy | 3%        |
| Leuciscidae    | <i>Luxilus pilsbryi</i>        | 0.14  | 0.13  | 0.02     | 0.02       | 0.00 | X   | -         | stream hierarchy | 6%        |
|                | MEAN                           | 0.22  | 0.16  | 0.25     | 0.30       | 0.08 |     |           |                  | 63%       |
|                | STDEV                          | 0.05  | 0.06  | 0.23     | 0.25       | 0.09 |     |           |                  | 35%       |

853 **TABLE 3** Summary of correlation among population genetic parameter estimates calculated for  $N=31$   
854 fish species collected across the White River Basin, U.S.A.  $H_S$ =within-site heterozygosity;  $H_T$ =total  
855 heterozygosity;  $G_{ST}$ =Nei's fixation index;  $G''_{ST}$ =unbiased fixation index; and  $D$ =Jost's genetic  
856 differentiation. Pearson's product-moment correlation between each parameter estimate is shown in the  
857 table below. Only significant ( $\alpha < 0.05$ ) correlations are shown.

858

|            | $H_S$ | $H_T$ | $G_{ST}$ | $G''_{ST}$ |
|------------|-------|-------|----------|------------|
| $H_T$      | ns    | -     |          |            |
| $G_{ST}$   | -0.75 | 0.52  | -        |            |
| $G''_{ST}$ | -0.71 | 0.55  | 0.99     | -          |
| $D$        | -0.65 | 0.67  | 0.97     | 0.96       |



859 **TABLE 4** Genetic variation of fish species ( $N=31$ ) sampled across the White River Basin (Ozark Mountains, U.S.A.), was tested using analysis of  
 860 molecular variance (AMOVA) to determine the proportion of genetic variation differing among distinct hydrologic units (HUCs) and among  
 861 discrete population clusters. HUC tests were performed at four HUC-levels (4-, 6-, 8-, and 10-digit HUCs) and the level depicting the most genetic  
 862 variance is shown. Var=percent genetic variance explained; sig=the significant of the test (\* for  $<0.05$  and ns for  $>0.05$ );  $\Phi_{ST}$  = genetic variation  
 863 among sites across all groups;  $\Phi_{SC}$  = genetic variation among sites within a group.

864

| Family         | Species                        | HUC-level                     | Hydrologic Units |      |   |             |             |      | Population Clusters |      |             |      |             |       |             |
|----------------|--------------------------------|-------------------------------|------------------|------|---|-------------|-------------|------|---------------------|------|-------------|------|-------------|-------|-------------|
|                |                                |                               | Among HUCs       |      |   | Among Sites |             |      | Among Pops          |      | Among Sites |      |             |       |             |
|                |                                |                               | %var             | sig. |   | %var        | $\Phi_{ST}$ | sig. | $\Phi_{SC}$         | %var | sig.        | %var | $\Phi_{ST}$ | sig.  | $\Phi_{SC}$ |
| Atherinopsidae | <i>Labidesthes sicculus</i>    | HUC-8                         | 21%              | *    |   | 19%         | 0.40        | *    | 0.24                | 25%  | *           | 18%  | 0.436       | *     | 0.243       |
|                | <i>Lepomis macrochirus</i>     | -                             | 0%               | ns   |   | 7%          | 0.07        | *    | 0.07                | -    | -           | -    | -           | -     | -           |
| Centrarchidae  | <i>Lepomis megalotis</i>       | HUC-4                         | 70%              | *    |   | 7%          | 0.77        | *    | 0.23                | 37%  | *           | 6%   | 0.428       | *     | 0.098       |
|                | <i>Micropterus dolomieu</i>    | HUC-8                         | 5%               | *    |   | 7%          | 0.12        | *    | 0.07                | -    | -           | -    | -           | -     | -           |
|                | <i>Micropterus salmoides</i>   | HUC-4                         | 3%               | *    |   | 0%          | 0.02        | ns   | 0.00                | -    | -           | -    | -           | -     | -           |
| Cottidae       | <i>Cottus caroliniae</i>       | HUC-8                         | 66%              | *    |   | 9%          | 0.74        | *    | 0.26                | 62%  | *           | 15%  | 0.772       | *     | 0.402       |
|                | <i>Cottus hypselurus</i>       | HUC-8                         | 84%              | ns   |   | 5%          | 0.89        | ns   | 0.31                | 85%  | ns          | 7%   | 0.917       | *     | 0.442       |
| Fundulidae     | <i>Fundulus catenatus</i>      | HUC-8                         | 36%              | *    |   | 15%         | 0.51        | *    | 0.23                | 36%  | *           | 16%  | 0.516       | *     | 0.244       |
|                | <i>Fundulus olivaceus</i>      | HUC-8                         | 18%              | *    |   | 18%         | 0.36        | *    | 0.22                | 16%  | *           | 21%  | 0.372       | *     | 0.252       |
|                | <i>Campostoma anomalum</i>     | HUC-8                         | 53%              | *    |   | 2%          | 0.55        | *    | 0.05                | 61%  | *           | 7%   | 0.680       | *     | 0.175       |
|                | <i>Campostoma oligolepis</i>   | HUC-8                         | 6%               | *    |   | 1%          | 0.07        | ns   | 0.01                | 5%   | *           | 3%   | 0.081       | *     | 0.036       |
|                | <i>Chrosomus erythrogaster</i> | -                             | -                | -    |   | -           | -           | -    | -                   | 62%  | *           | 21%  | 0.829       | *     | 0.548       |
|                | <i>Cyprinella galactura</i>    | HUC-8                         | 7%               | *    |   | 0%          | 0.07        | ns   | 0.00                | -    | -           | -    | -           | -     | -           |
|                | <i>Cyprinella whipplei</i>     | HUC-8                         | 14%              | *    |   | 4%          | 0.18        | *    | 0.05                | 14%  | ns          | 7%   | 0.202       | *     | 0.078       |
|                | <i>Luxilus chrysocephalus</i>  | HUC-8                         | 14%              | *    |   | 7%          | 0.21        | *    | 0.08                | 17%  | *           | 10%  | 0.266       | *     | 0.120       |
| Leuciscidae    | <i>Luxilus pilsbryi</i>        | HUC-10                        | 1%               | ns   |   | 1%          | 0.02        | *    | 0.01                | -    | -           | -    | -           | -     | -           |
|                | <i>Luxilus zonatus</i>         | HUC-10                        | 15%              | *    |   | 3%          | 0.18        | *    | 0.03                | 9%   | *           | 10%  | 0.199       | *     | 0.115       |
|                | <i>Lythrurus umbratilis</i>    | -                             | 0%               | ns   |   | 22%         | 0.20        | *    | 0.22                | -    | -           | -    | -           | -     | -           |
|                | <i>Notropis boops</i>          | HUC-8                         | 6%               | *    |   | 3%          | 0.09        | *    | 0.03                | 6%   | *           | 6%   | 0.113       | *     | 0.059       |
|                | <i>Notropis nubilus</i>        | HUC-4                         | 10%              | *    |   | 7%          | 0.17        | *    | 0.08                | 16%  | *           | 1%   | 0.172       | *     | 0.015       |
|                | <i>Notropis percobromus</i>    | HUC-8                         | 1%               | *    |   | 1%          | 0.01        | ns   | 0.01                | -    | -           | -    | -           | -     | -           |
|                | <i>Notropis telescopus</i>     | HUC-8                         | 33%              | *    |   | 1%          | 0.34        | *    | 0.01                | 41%  | *           | 3%   | 0.436       | *     | 0.046       |
|                | <i>Pimephales notatus</i>      | HUC-8                         | 17%              | *    |   | 26%         | 0.44        | *    | 0.32                | 13%  | *           | 32%  | 0.453       | *     | 0.372       |
|                | <i>Semotilus atromaculatus</i> | HUC-8                         | 87%              | ns   |   | 1%          | 0.88        | *    | 0.08                | 92%  | *           | 2%   | 0.934       | *     | 0.194       |
|                |                                | <i>Etheostoma blennioides</i> | HUC-8            | 61%  | * |             | 2%          | 0.62 | *                   | 0.04 | 67%         | *    | 2%          | 0.686 | *           |
| Percidae       | <i>Etheostoma caeruleum</i>    | HUC-8                         | 40%              | *    |   | 3%          | 0.44        | *    | 0.06                | 45%  | *           | 5%   | 0.497       | *     | 0.093       |
|                | <i>Etheostoma flabellare</i>   | -                             | 0%               | ns   |   | 99%         | 0.98        | *    | 0.98                | 95%  | *           | 3%   | 0.977       | ns    | 0.580       |
|                | <i>Etheostoma juliae</i>       | HUC-8                         | 34%              | *    |   | 11%         | 0.45        | *    | 0.16                | 36%  | *           | 12%  | 0.478       | *     | 0.182       |
|                | <i>Etheostoma spectabile</i>   | HUC-8                         | 29%              | *    |   | 10%         | 0.38        | *    | 0.14                | 26%  | *           | 13%  | 0.394       | *     | 0.181       |
|                | <i>Etheostoma zonale</i>       | HUC-8                         | 32%              | *    |   | 2%          | 0.34        | *    | 0.02                | 38%  | *           | 5%   | 0.422       | *     | 0.074       |
|                | Poeciliidae                    | <i>Gambusia affinis</i>       | HUC-4            | 7%   | * |             | 13%         | 0.20 | *                   | 0.14 | 13%         | ns   | 11%         | 0.239 | *           |

865 **FIGURE 1** Fish were sampled at  $N=75$  locations across the White River Basin (Ozark Mountains,  
866 U.S.A.). The study basin is contained within the larger Mississippi River Basin, and is a direct tributary to  
867 the mainstem Mississippi. The study region is subdivided into five subbasins: Upper White, Lower White,  
868 Black, Little Red, and the St. Francis. Beyond these basins, USGS Hydrologic Unit Codes (HUCs) were  
869 also used to characterize the stream hierarchy position of sampling locations (4-, 6-, 8-, and 10-digit  
870 HUCs).  
871

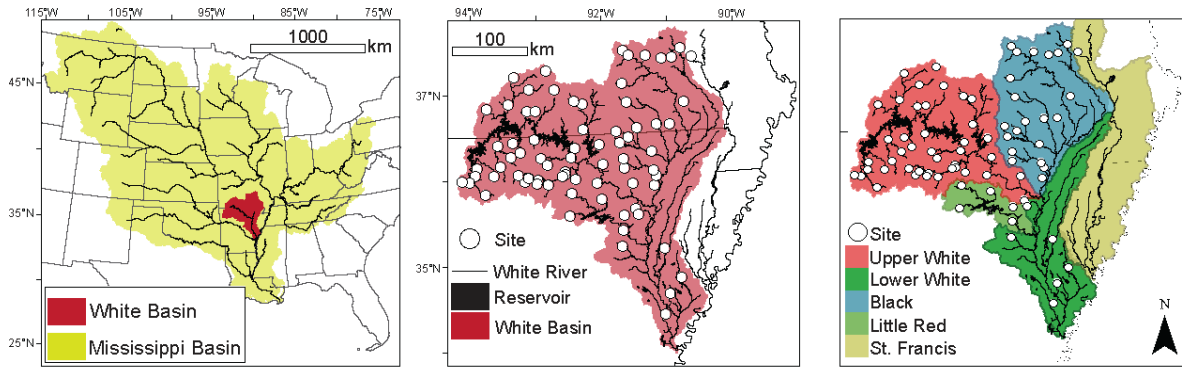

Hydrologic Unit Code (HUC) Basins

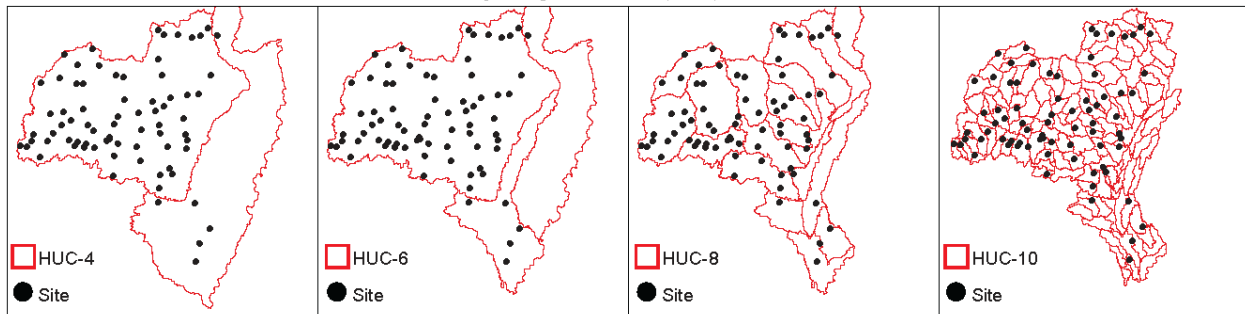

872

873 **FIGURE 2** Genetic structure of  $N=31$  fish species collected across the White River Basin (Ozark  
 874 Mountains, U.S.A.) as summarized by among-site  $F_{ST}$  (Weir and Cockerham's  $\theta$ ) and Jost's  $D$ . Boxplots  
 875 show the distributions of both pairwise estimates among sampling sites for each species. Inner quantiles  
 876 are colored to indicate species in the same family ( $N=7$ ).  
 877

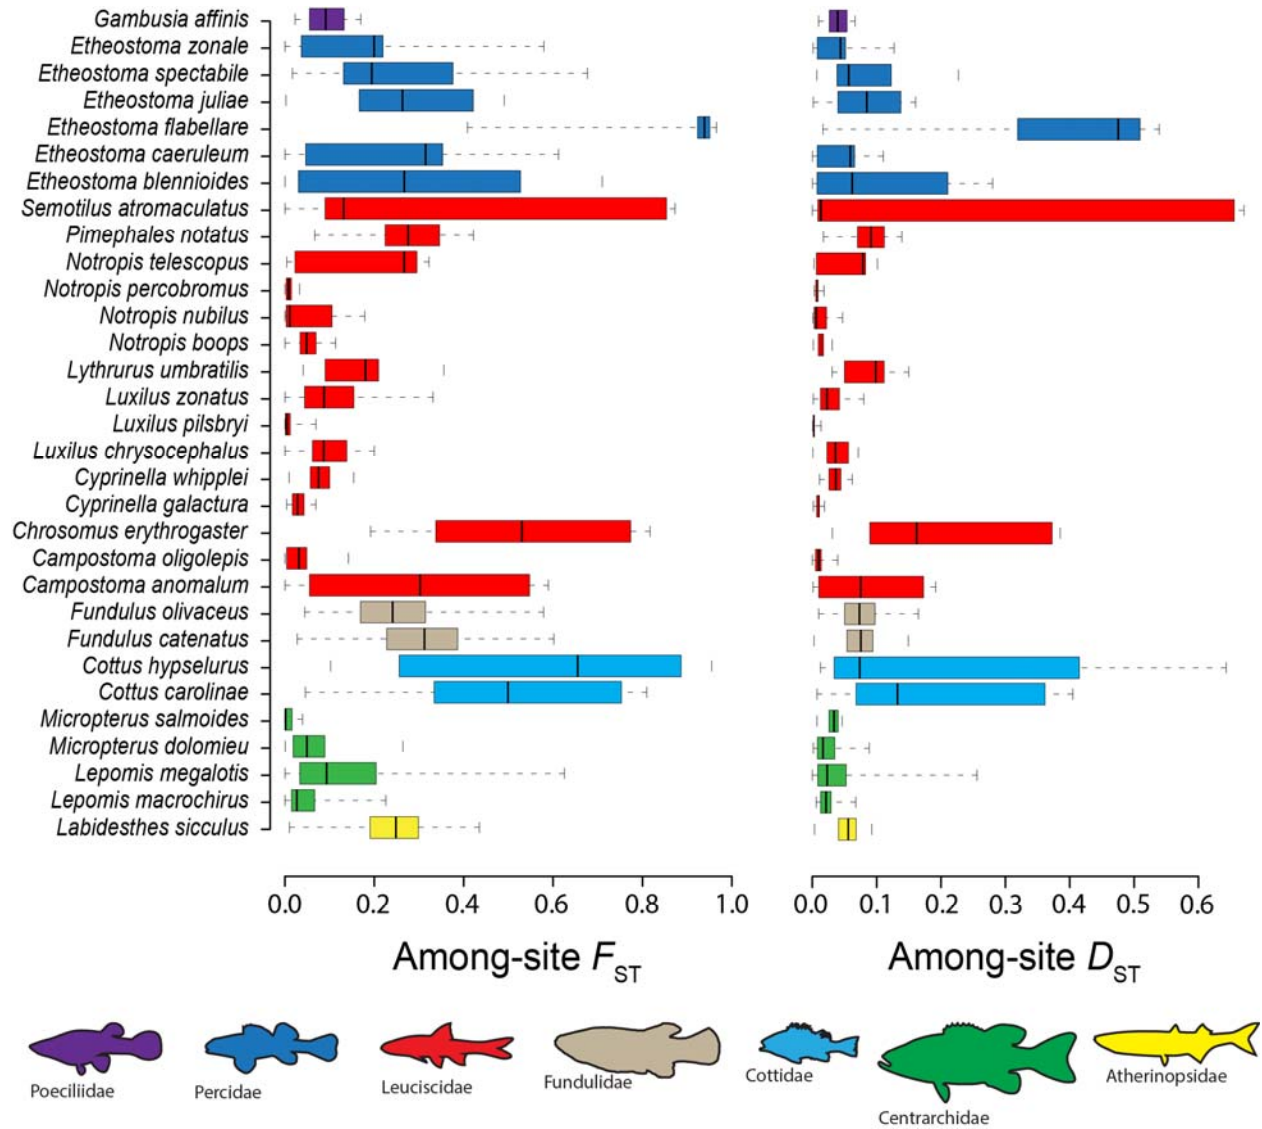

879 **FIGURE 3** Isolation by distance plots for  $N=31$  fish species collected across the White River Basin (   
 880 Ozark Mountains, U.S.A.). Each depicts the relationship between among-site  $F_{ST}$  (linearized) and log river   
 881 distance among sites. The following are represented below each species name:  $m$ =slope of the linear   
 882 regression model (dashed red line) and  $r$ = the Mantel coefficient indicating the strength of the correlation   
 883 between genetic structure and distance. Significant  $r$ -values denoted with a red asterisk ( $\alpha \leq 0.05$ ).   
 884

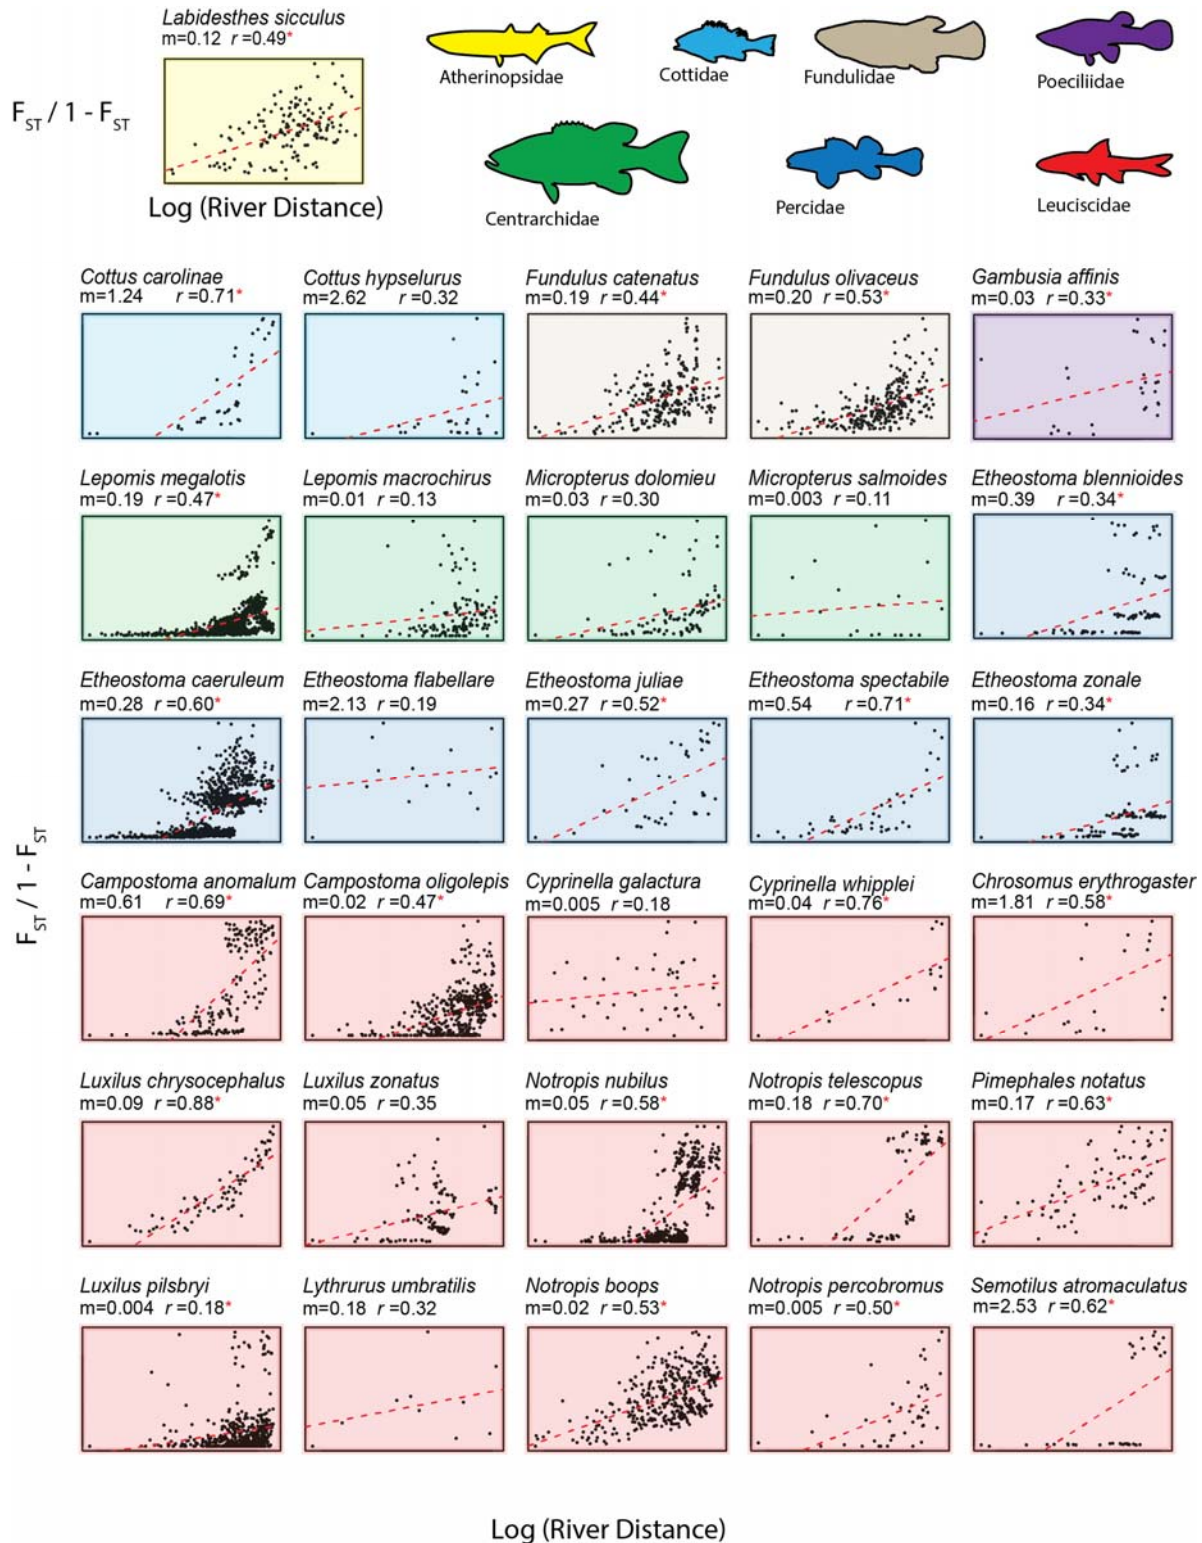

885

886 **FIGURE 4** Sampling distribution maps of seven species which showed no evidence of discrete genetic  
887 population structure within the White River Basin ( Ozark Mountains, U.S.A.). A total of  $N=31$  species  
888 were sampled across 75 sites. The number of collection sites (red circles) for each species is denoted by  
889  $N$ ;  $K$ =the number of discrete genetic populations discerned from sparse non-negative matrix factorization.  
890

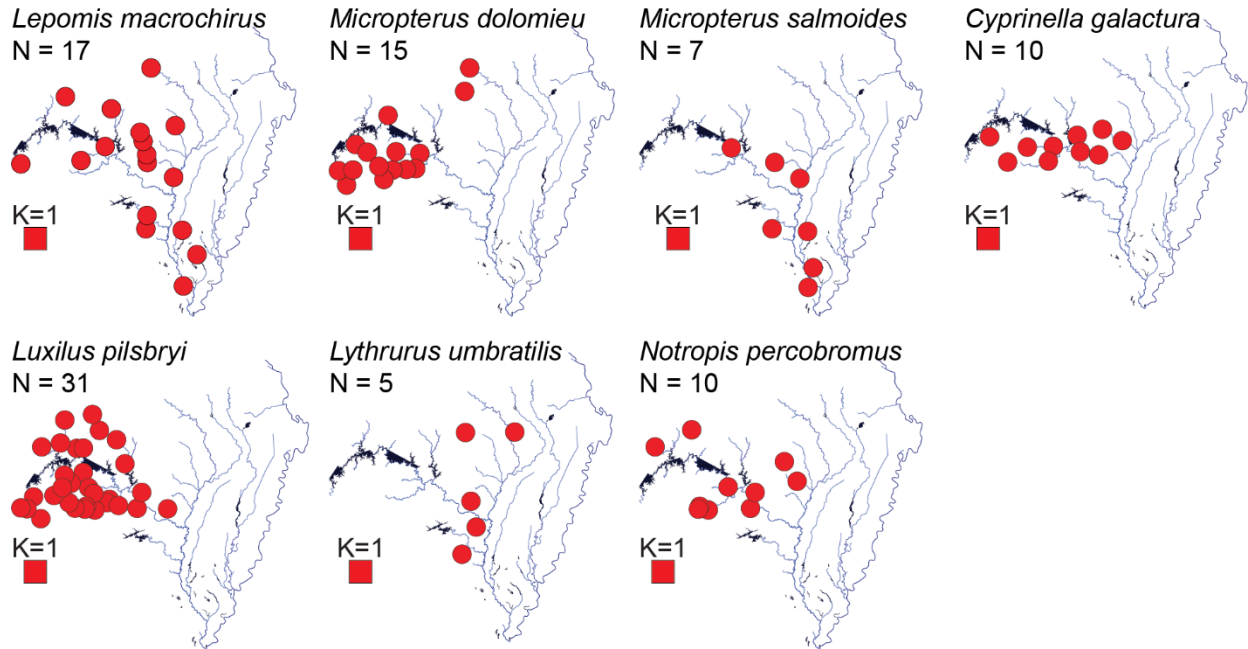

891

892 **FIGURE 5** Sampling distribution maps of 24 species which showed evidence of genetic population structure  
893 within the White River Basin (Ozark Mountains, U.S.A.).  $N=31$  species were sampled across 75 sites.  $K$ = the  
894 number of discrete genetic populations discerned from sparse non-negative matrix factorization. Sampling  
895 sites are denoted as pie charts representing the average population coefficients for each site.  $N$ = number of  
896 sites where each species was collected.

897

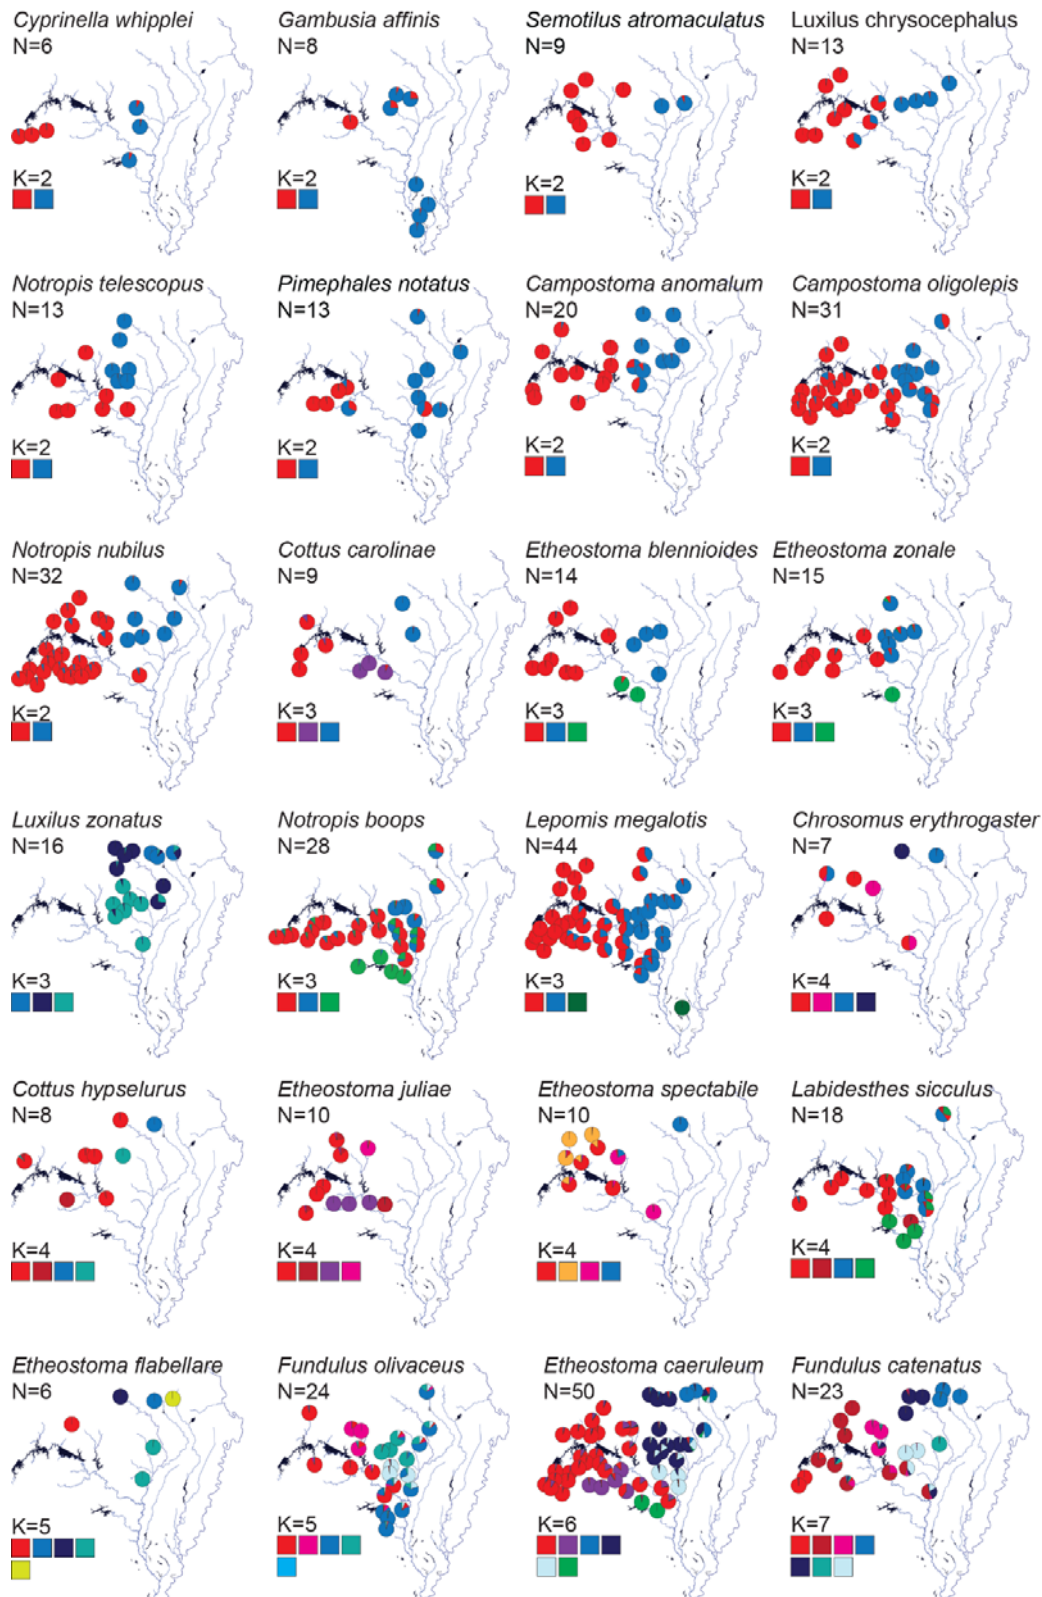

898

899 **FIGURE 6** Neutral genetic variation was partitioned between four explanatory models for  $N=31$  fish  
900 species sampled across the White River Basin (Ozark Mountains, U.S.A.). Partitioning was conducted  
901 separately for each species. The four models represent: (i) isolation by *distance*, the river network  
902 distance among individuals represented by spatial eigenvectors; (ii) isolation by *barrier*, represented by  
903 population structure coefficients among individuals; (iii) isolation by *stream hierarchy*, based on the  
904 hydrologic units (at four different hierarchical levels) in which an individual was collected; and (iv)  
905 isolation by *environment*, characterized by the environmental heterogeneity across sampling sites where  
906 individuals were collected. Total = the genetic variation explained by all four models combined. The  
907 "Pure" models represent the variation explained by each model after partialling out the variation  
908 explained by the other three models.  
909

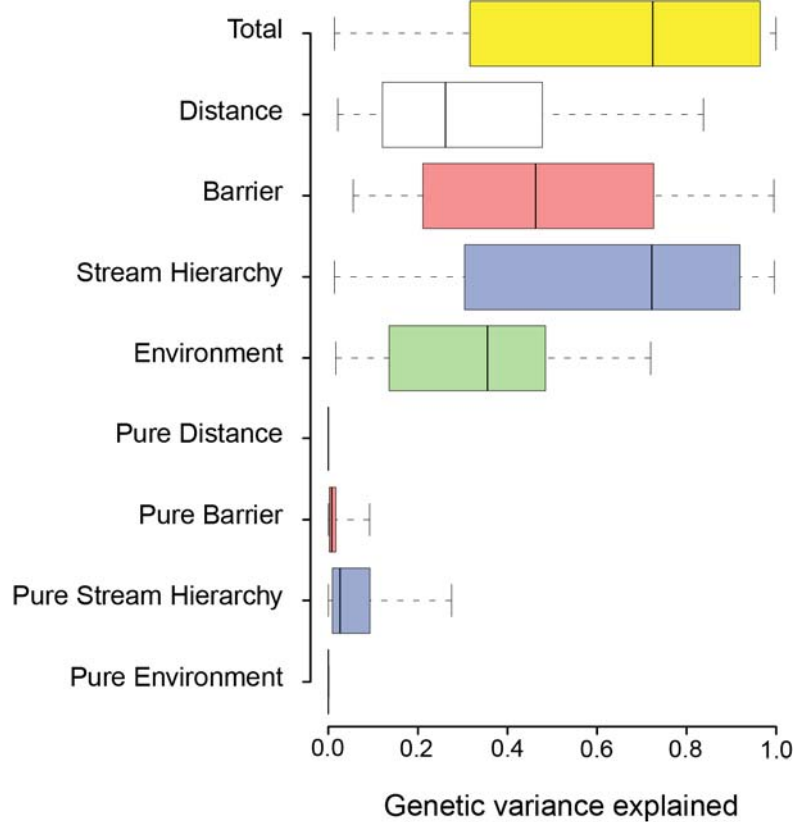

910

911 **FIGURE 7** Venn diagrams depict neutral genetic variation resulting from four models as applied to  $N=31$   
 912 fish species sampled from the White River Basin (Ozark Mountains, U.S.A.). Models were based on: (i)  
 913 isolation by distance, isolation by barrier, isolation by stream hierarchy, and isolation by environment.  
 914 Values in the Venn diagrams are percent of genetic variance explained (i.e., rounded adjusted  $R^2$  values).  
 915 Total variance explained is shown below each diagram. The bottom two rows show species that showed  
 916 no discrete population structure (i.e., no isolation by barrier) and thus only three of the models were  
 917 tested.

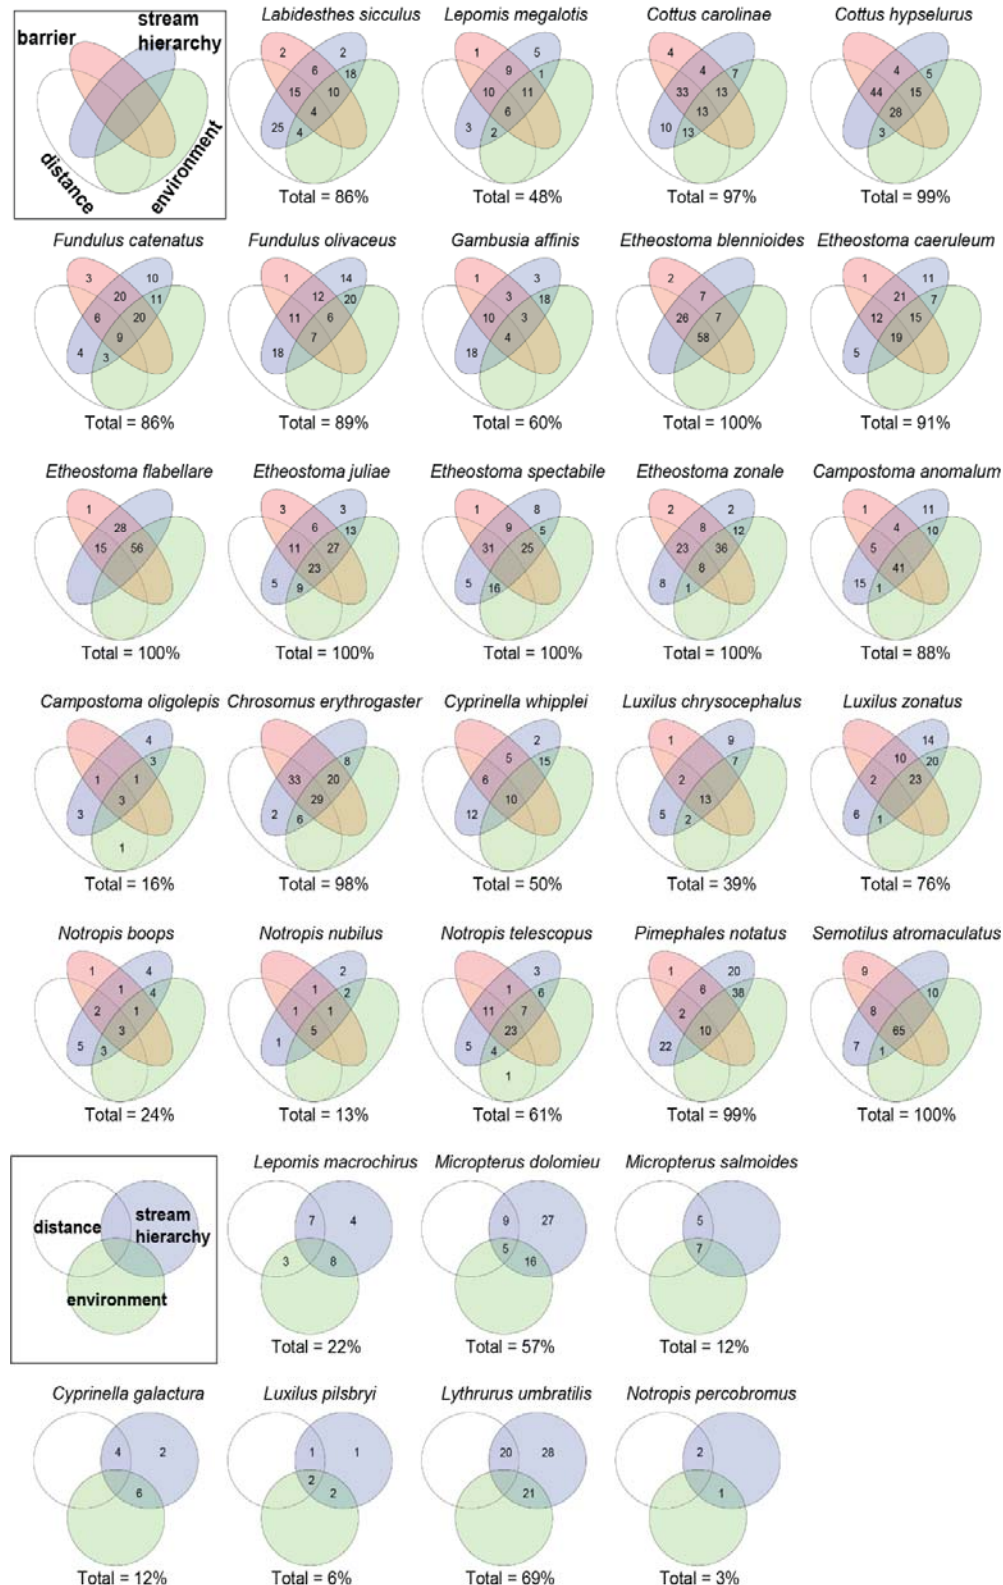

918
